# Supplementary material for: Facile synthesis and antitumor activity of novel N(9) methylated AHMA analogs
Source: Royal Society of Chemistry journal article supplement (doi:10.1039/c2nj40567a), 2012-01-01

## Facile synthesis of potential antitumor novel *N*(9) methylated AHMA analogs.

Boris Redko,<sup>a,b</sup> Amnon Albeck<sup>b</sup> and Gary Gellerman<sup>\*a</sup>

*a.* Department of Biological Chemistry, Ariel University Center of Samaria, Ariel 40700, Israel; *b.* The Julius Spokojny Bioorganic Chemistry Laboratory, Department of Chemistry, Bar-Ilan University, Ramat Gan 52900, Israel

**\*Correspondence to:** Gary Gellerman

Dept. Biological Chemistry

Ariel University Center of Samaria

P.O.B. 3, Ariel 40700, Israel

Tel.: +972-3-937-1442; Fax: +972-3-906-6634

E-mail: [garyg@ariel.ac.il](mailto:garyg@ariel.ac.il)

### <sup>1</sup>H NMR of Compound 12 :

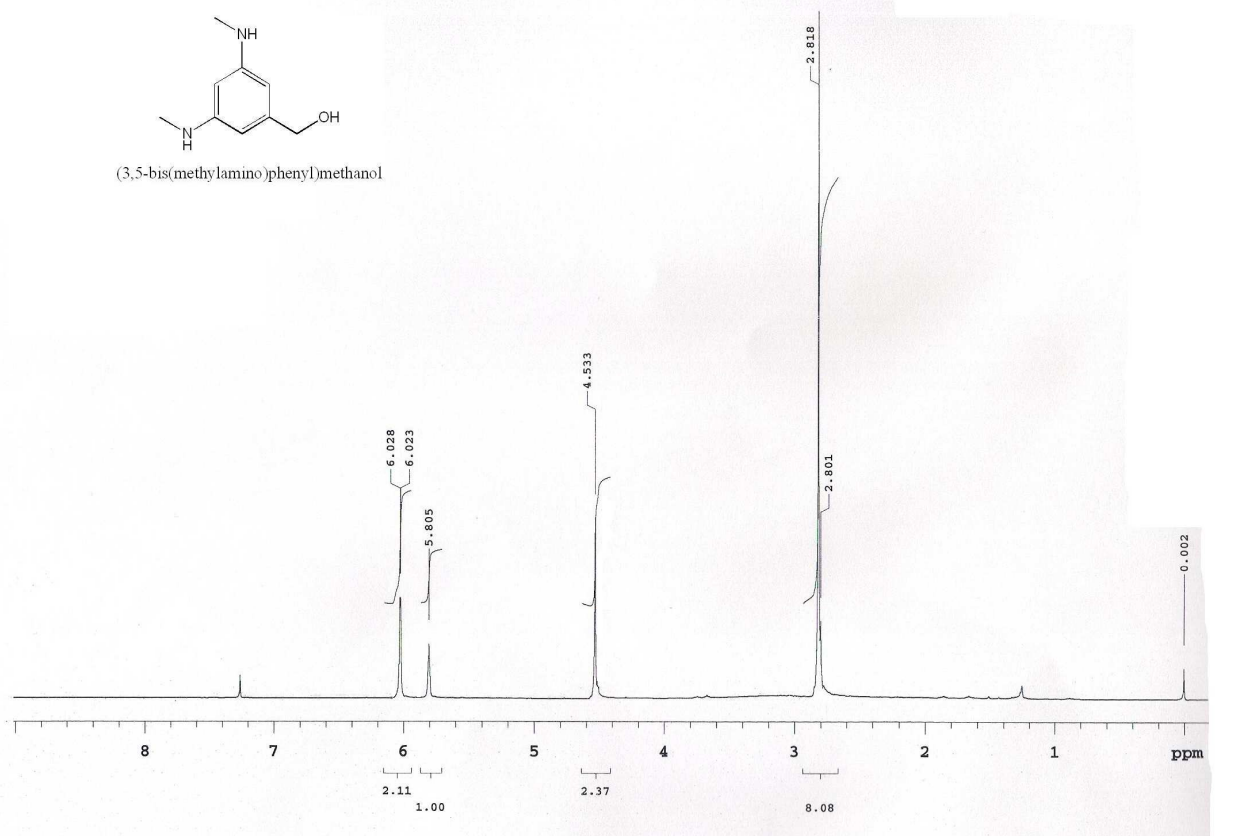

### <sup>13</sup>C NMR of Compound 12 :

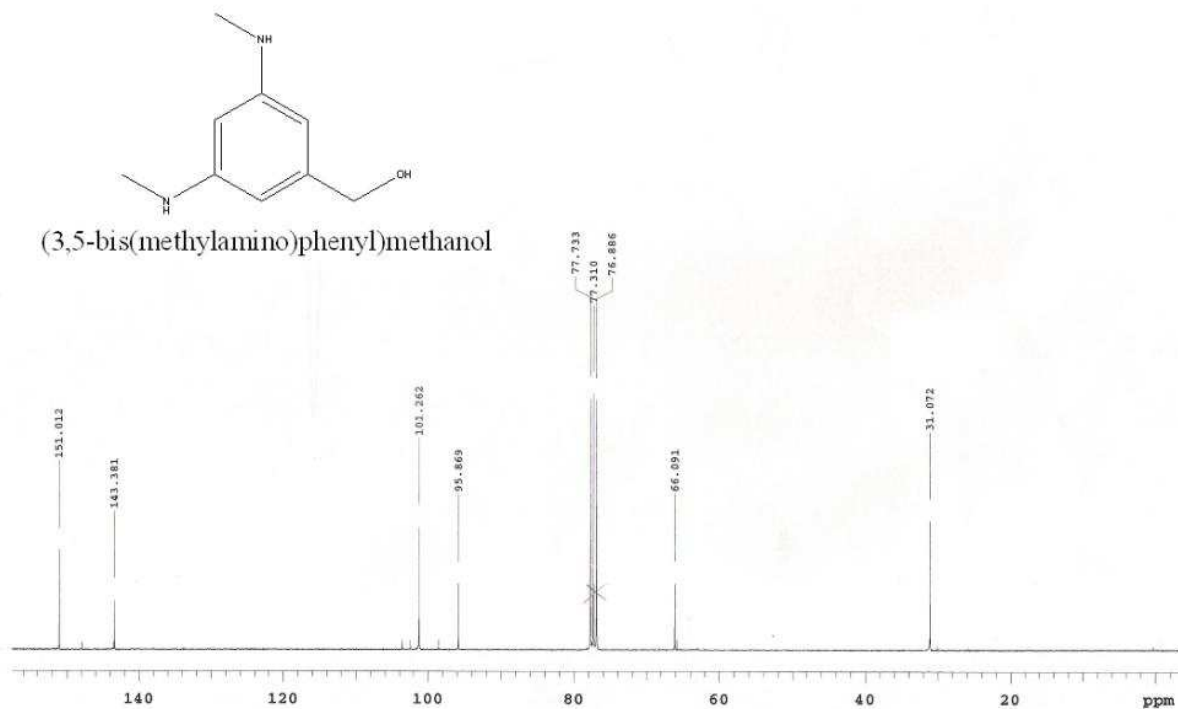

### HRMS of Compound 12:

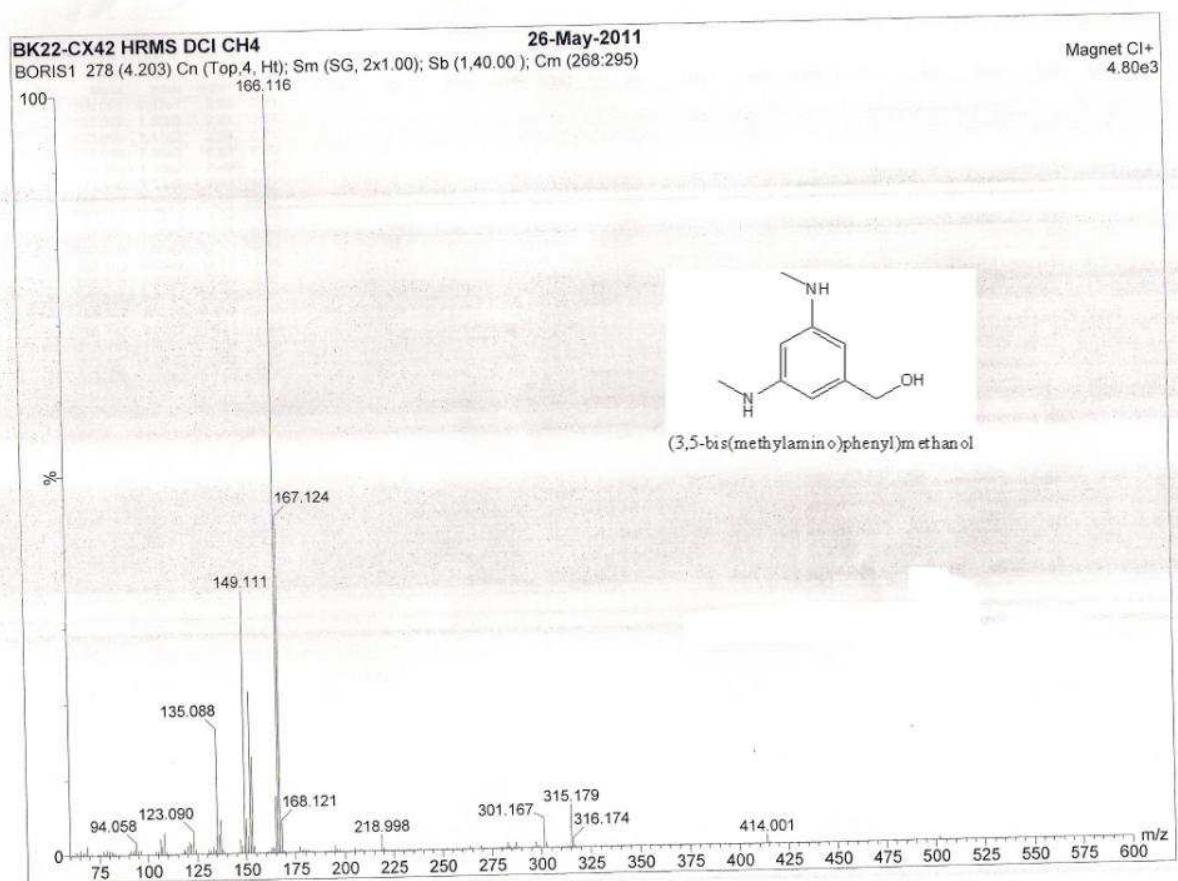

### $^1\text{H}$ NMR of Compound 13 :

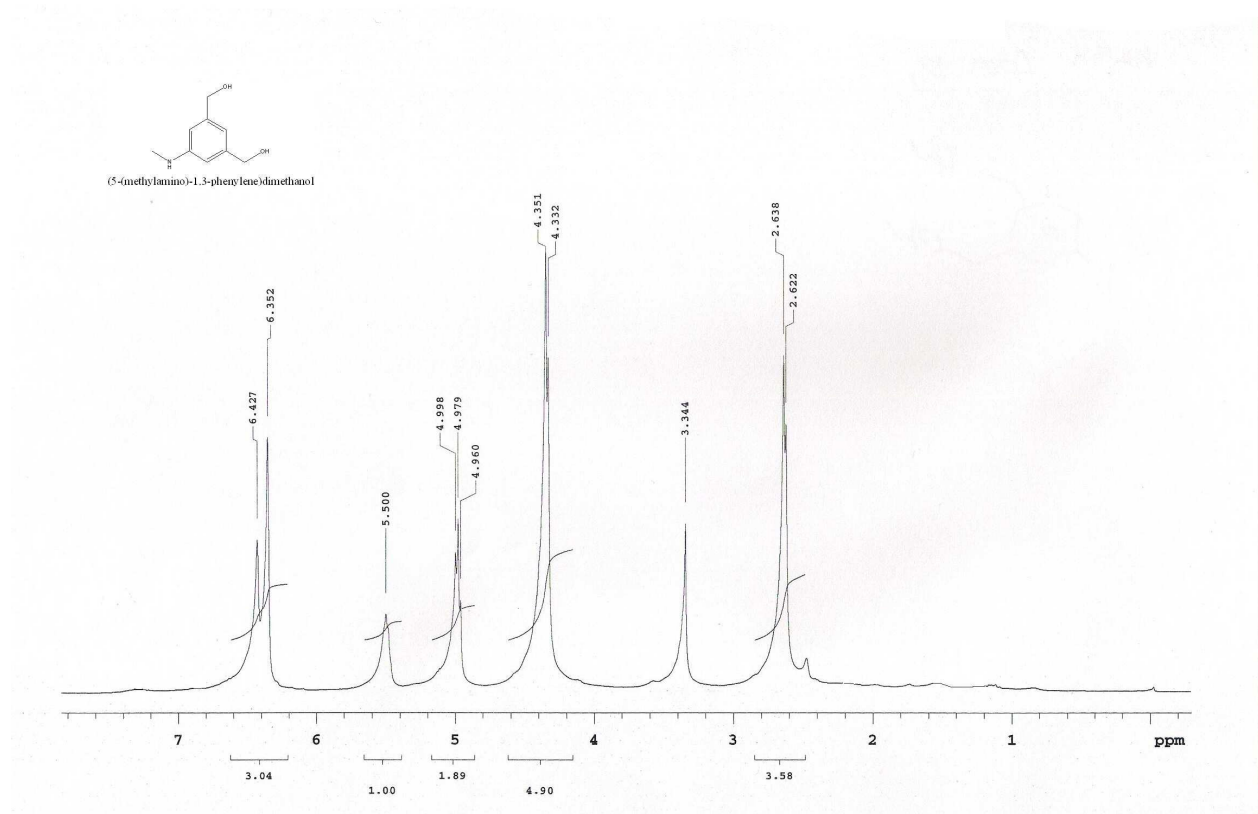

### $^{13}\text{C}$ NMR of Compound 13 :

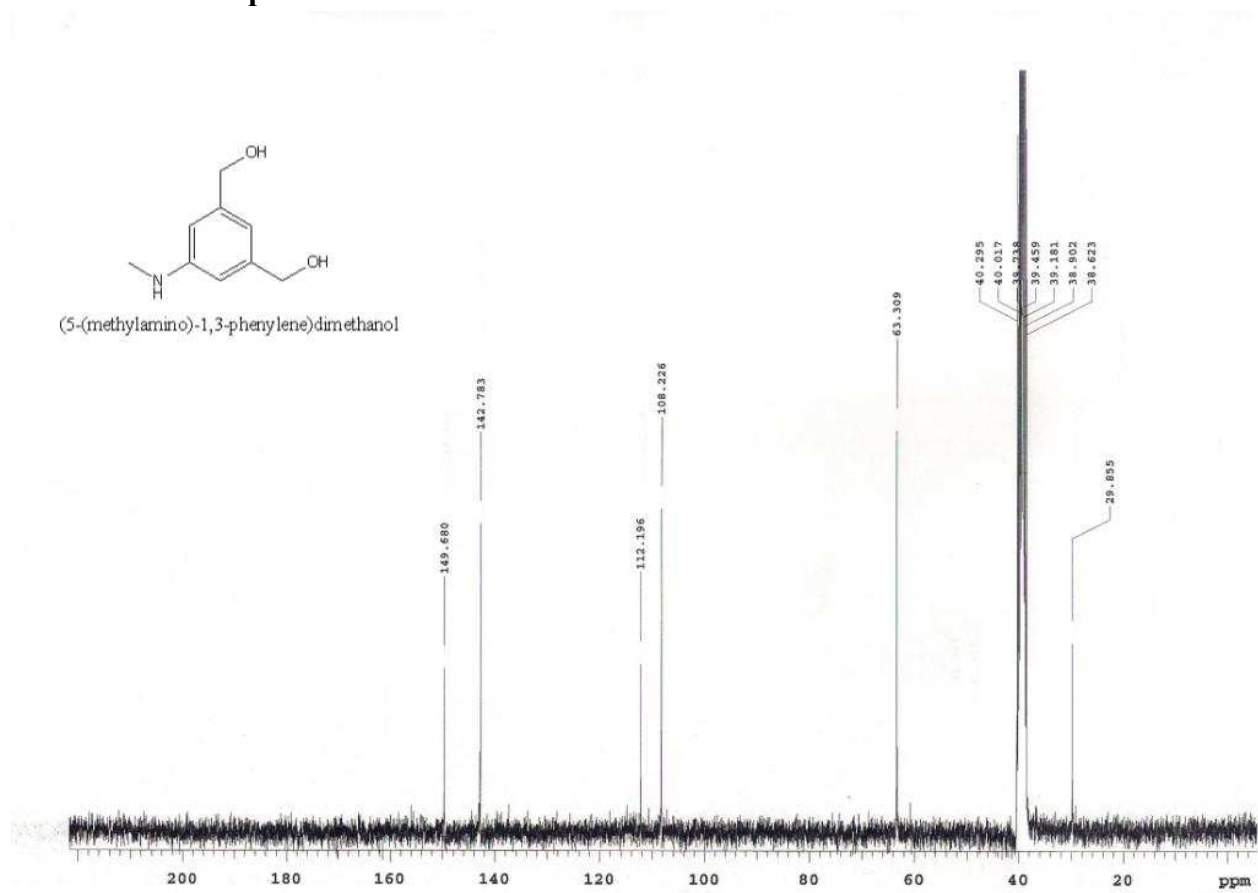

### HRMS of Compound 13:

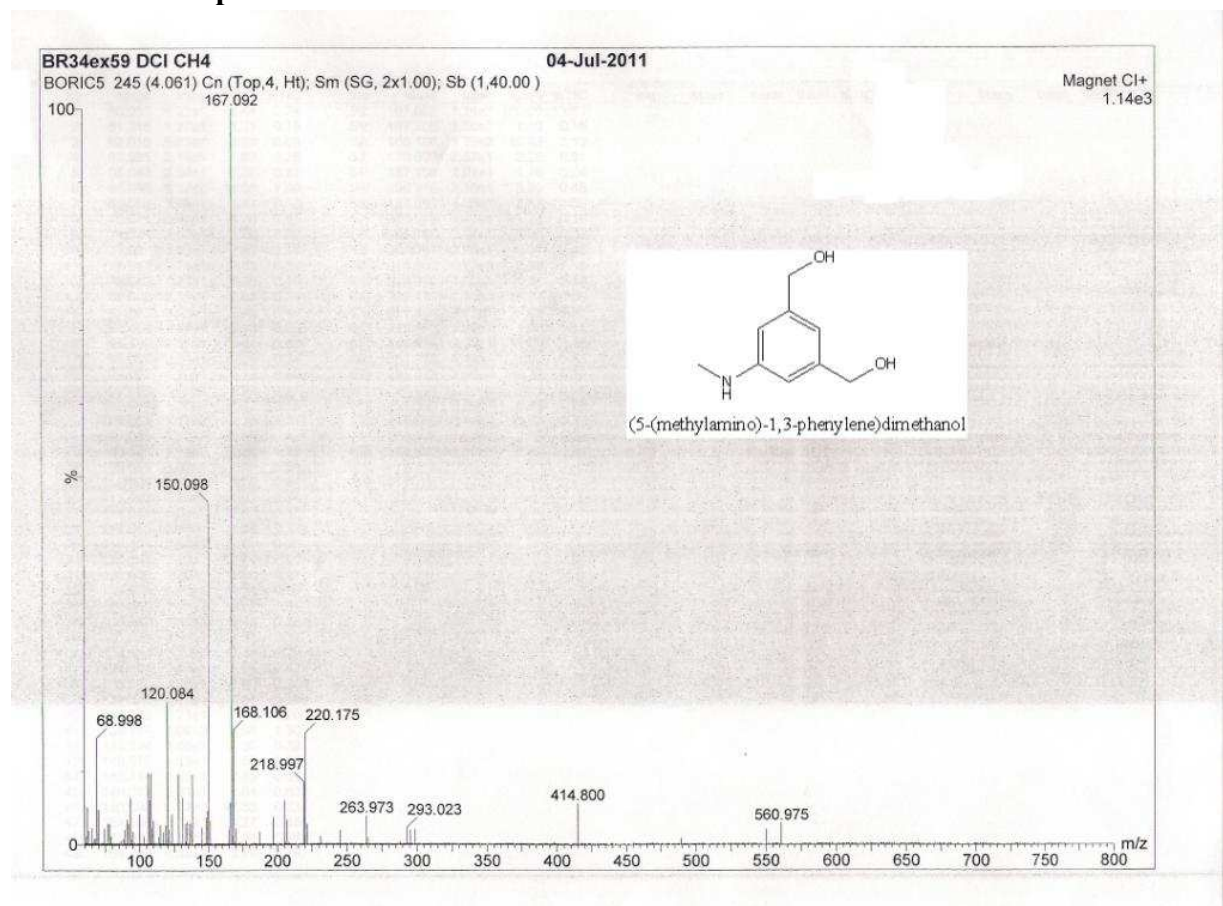

### <sup>1</sup>H NMR of Compound 14 :

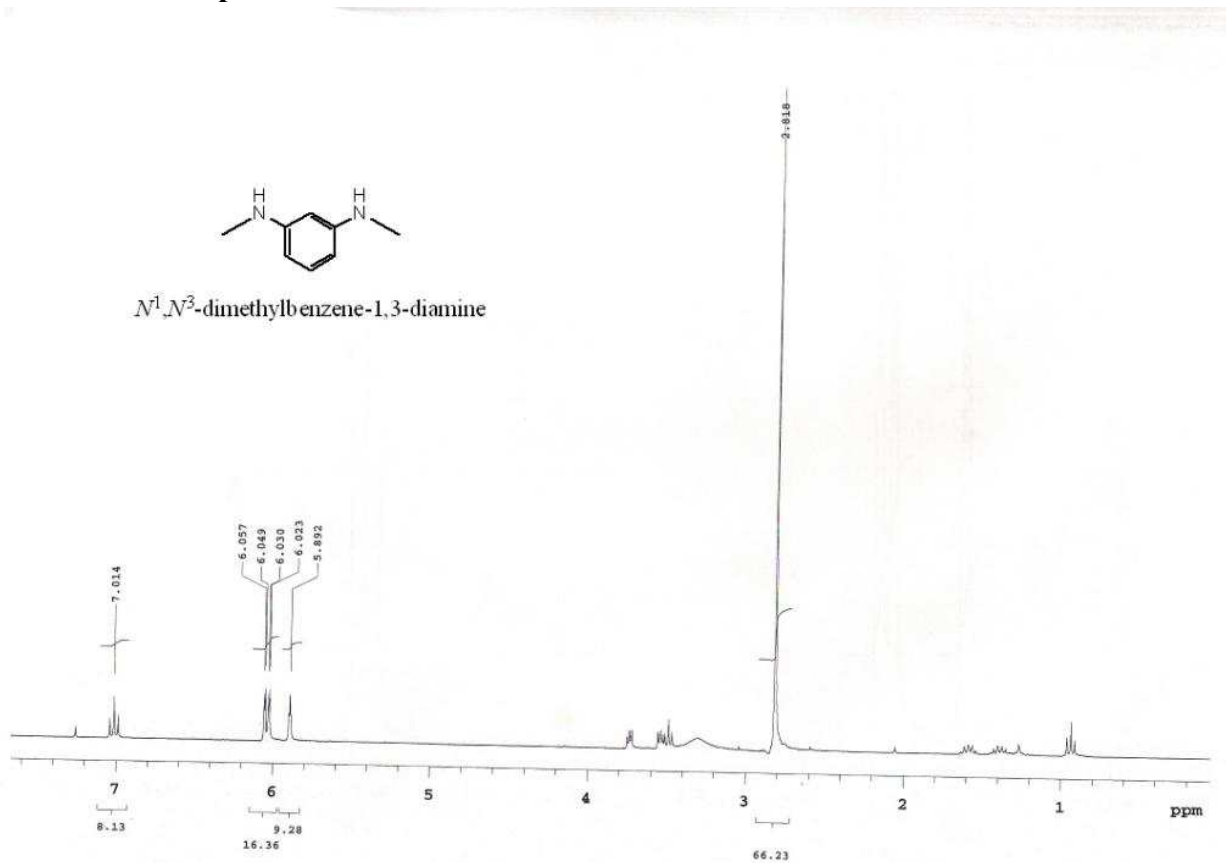



**$^{13}\text{C}$  NMR of Compound 14 :**

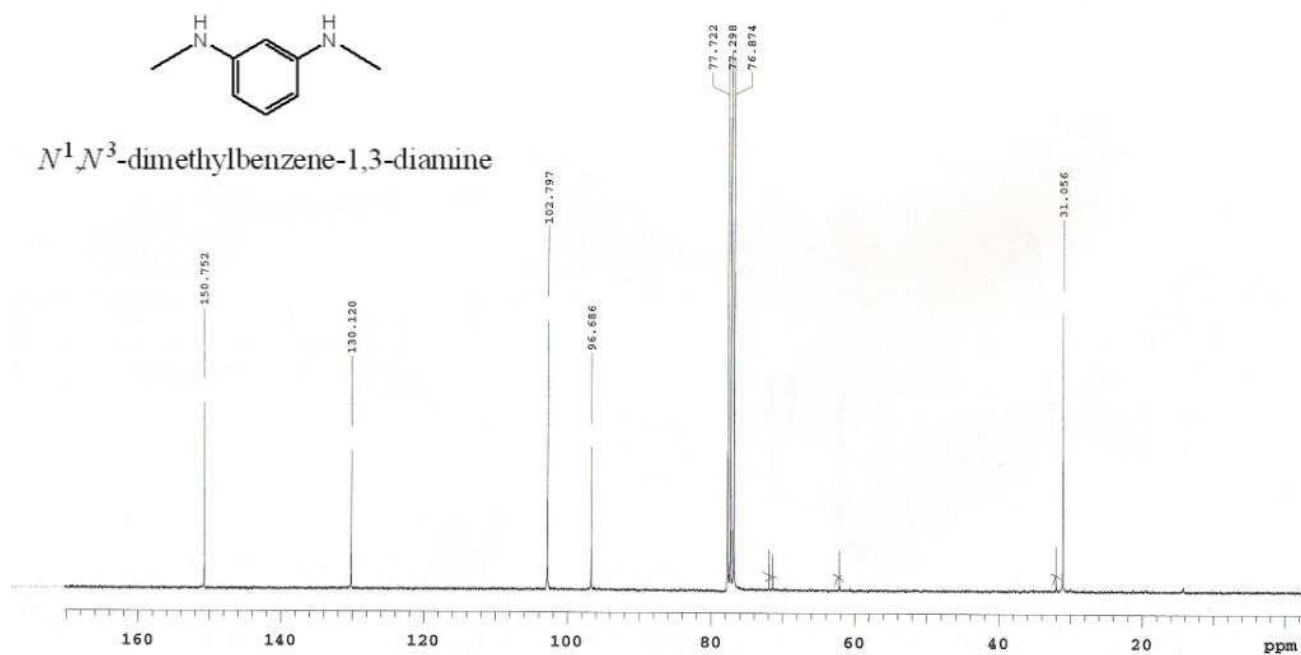

**HRMS of Compound 14:**

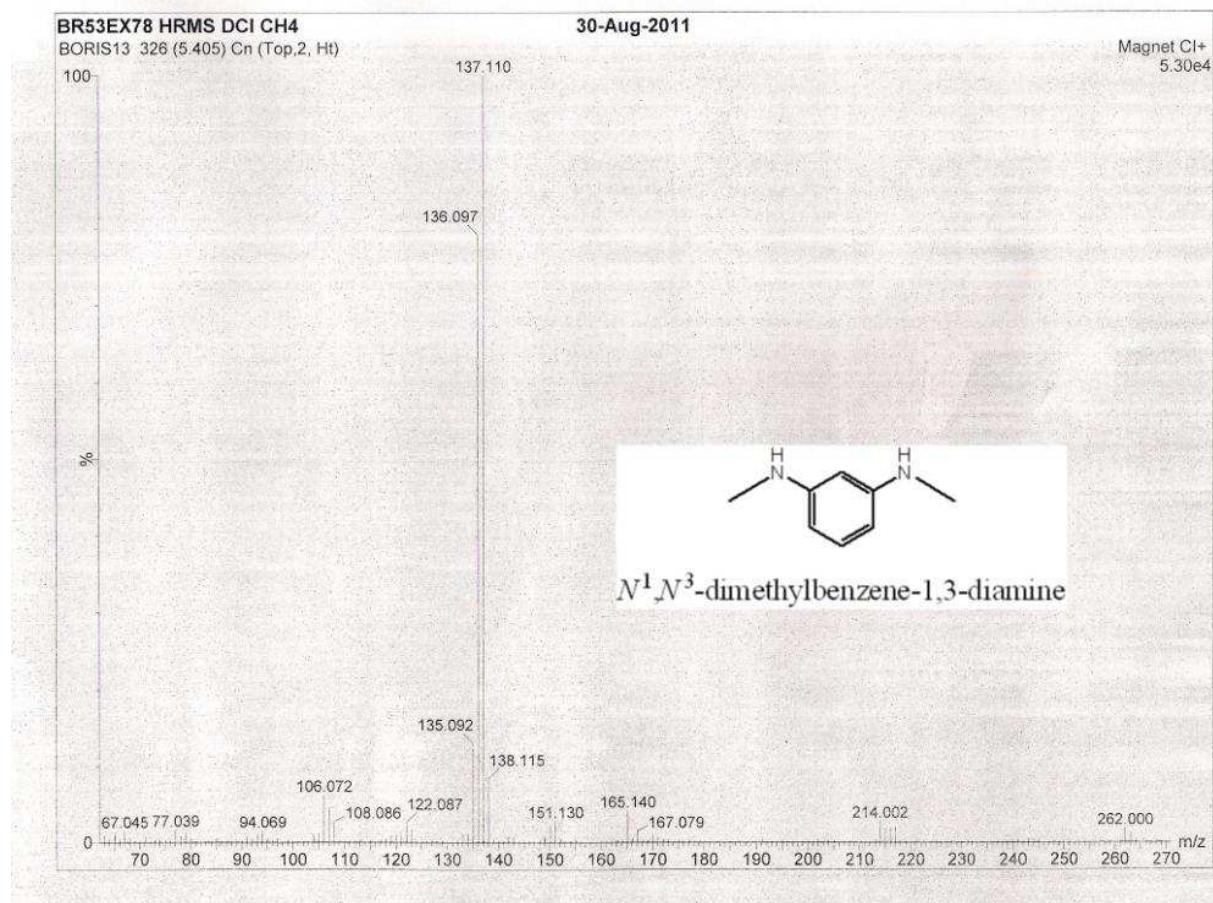

**<sup>1</sup>H NMR of Compound 15 :**

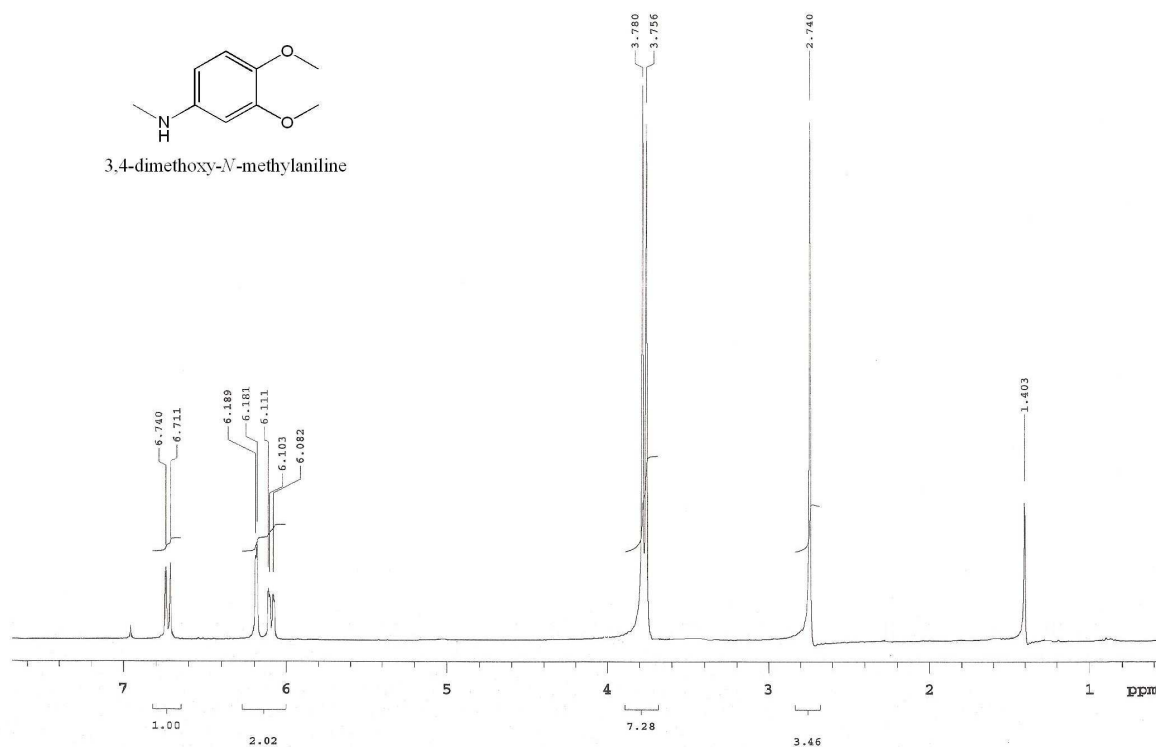

**<sup>13</sup>C NMR of Compound 15 :**

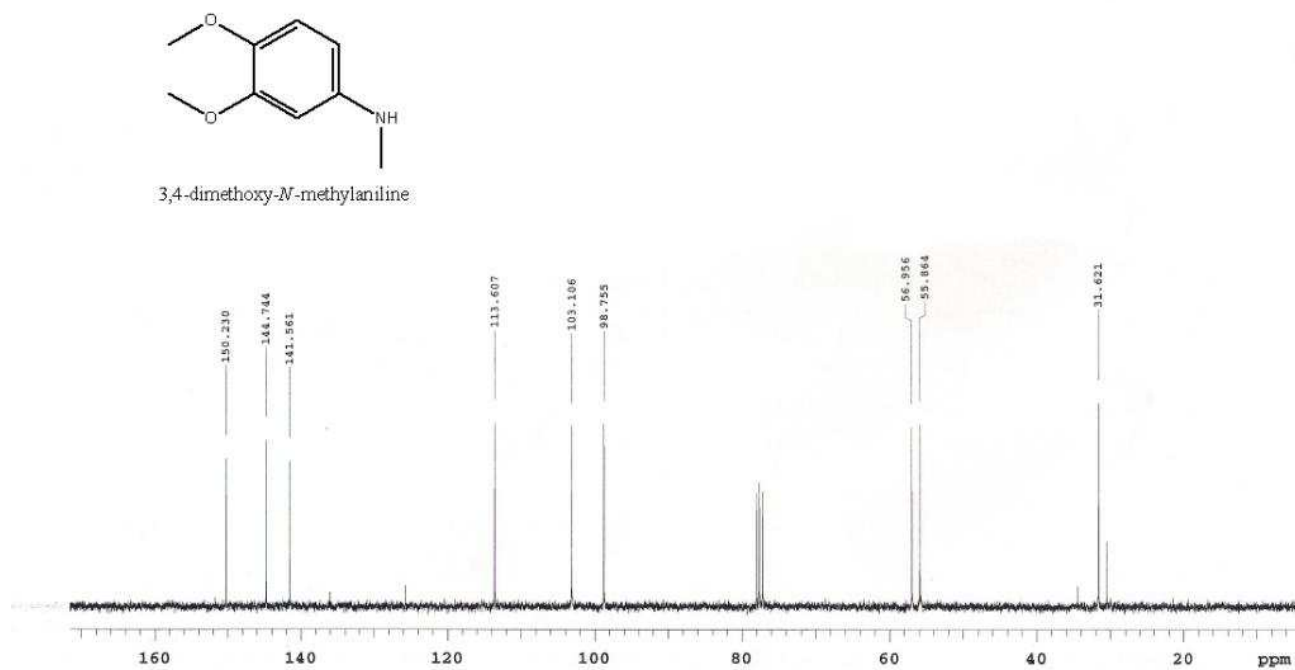

### MS of Compound 15:

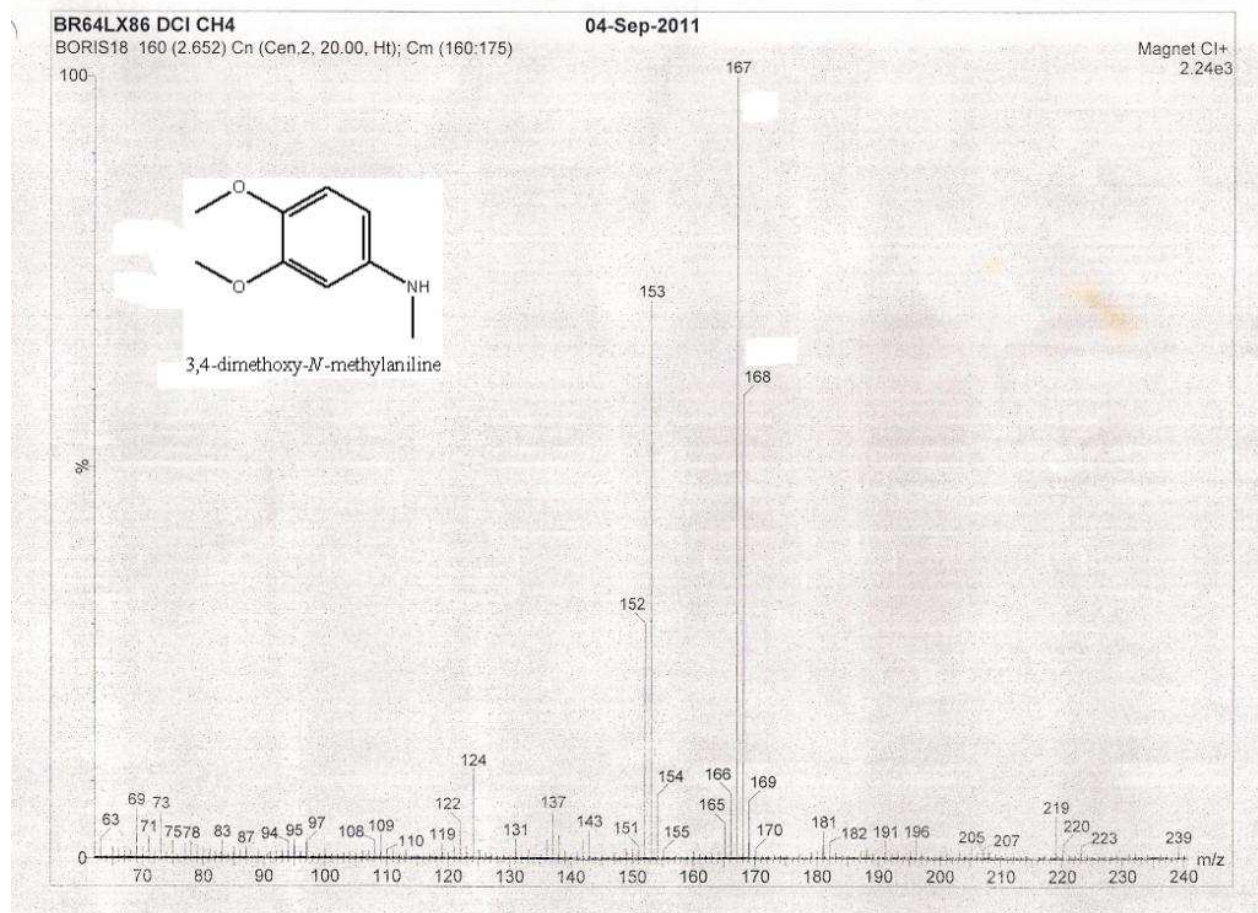

### <sup>1</sup>H NMR of Compound 16

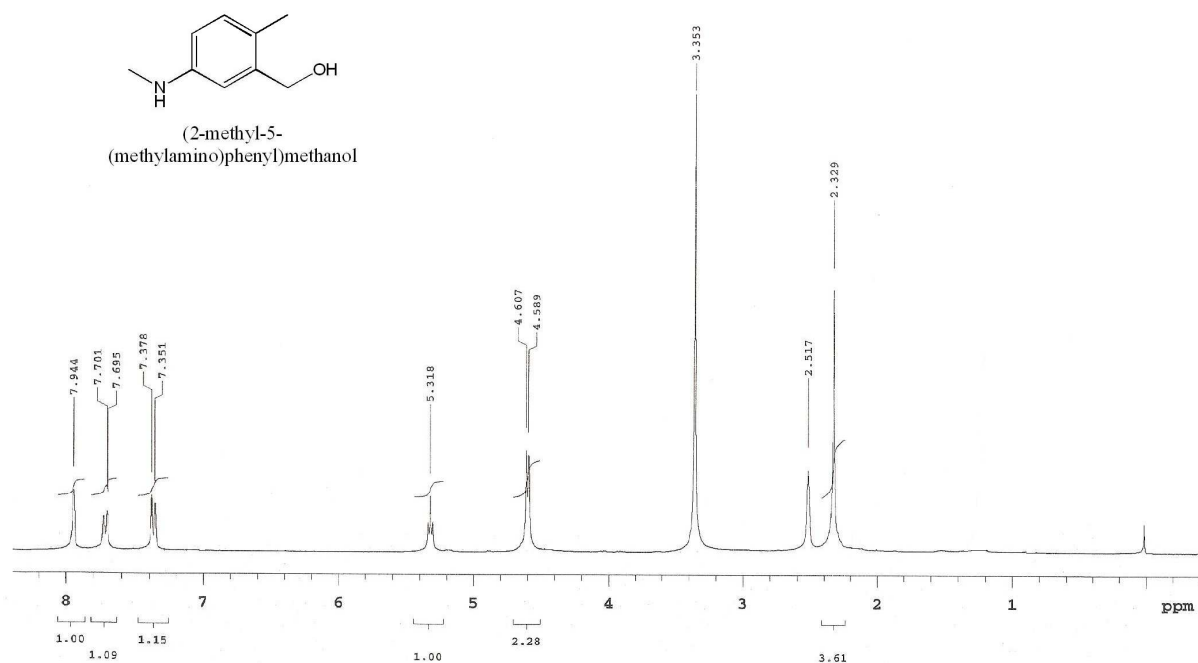



### <sup>13</sup>C NMR of Compound 16 :

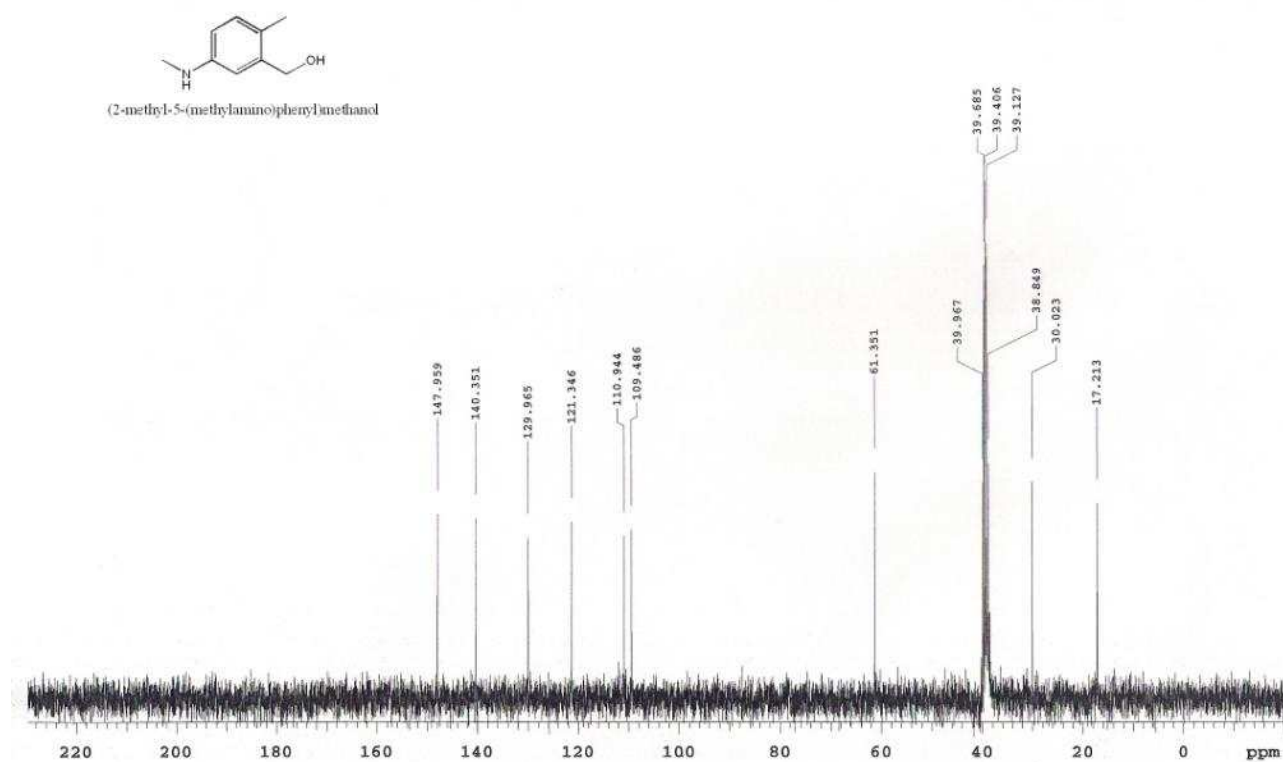

### HRMS of Compound 16:

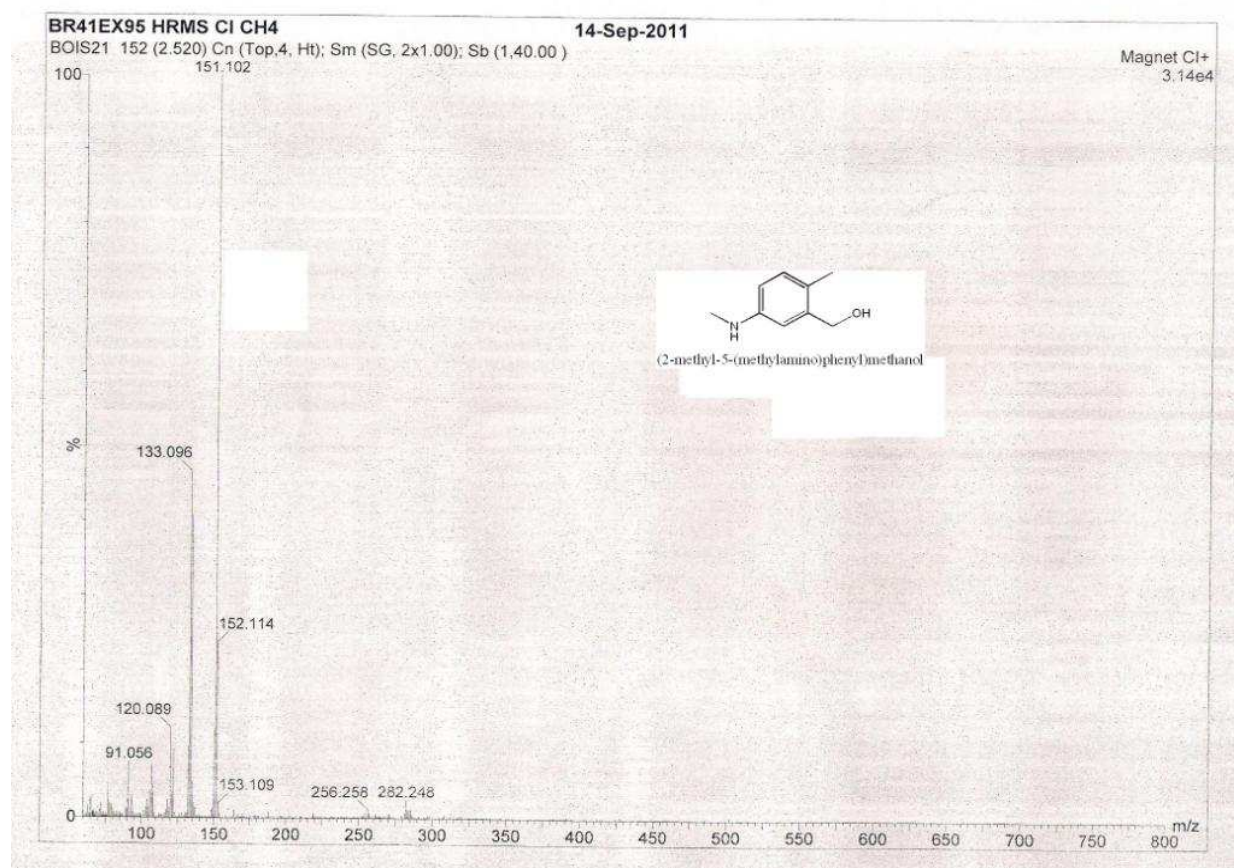



**HMAC Compound 16:**

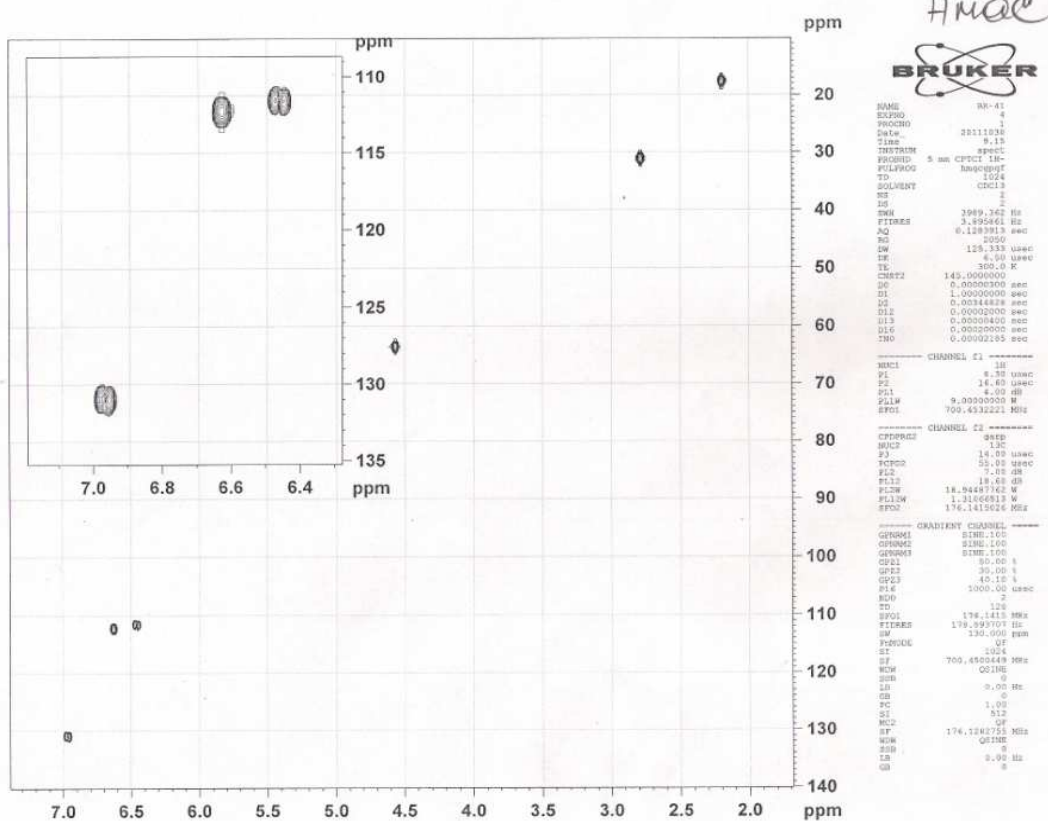

**HMBC of Compound 16:**

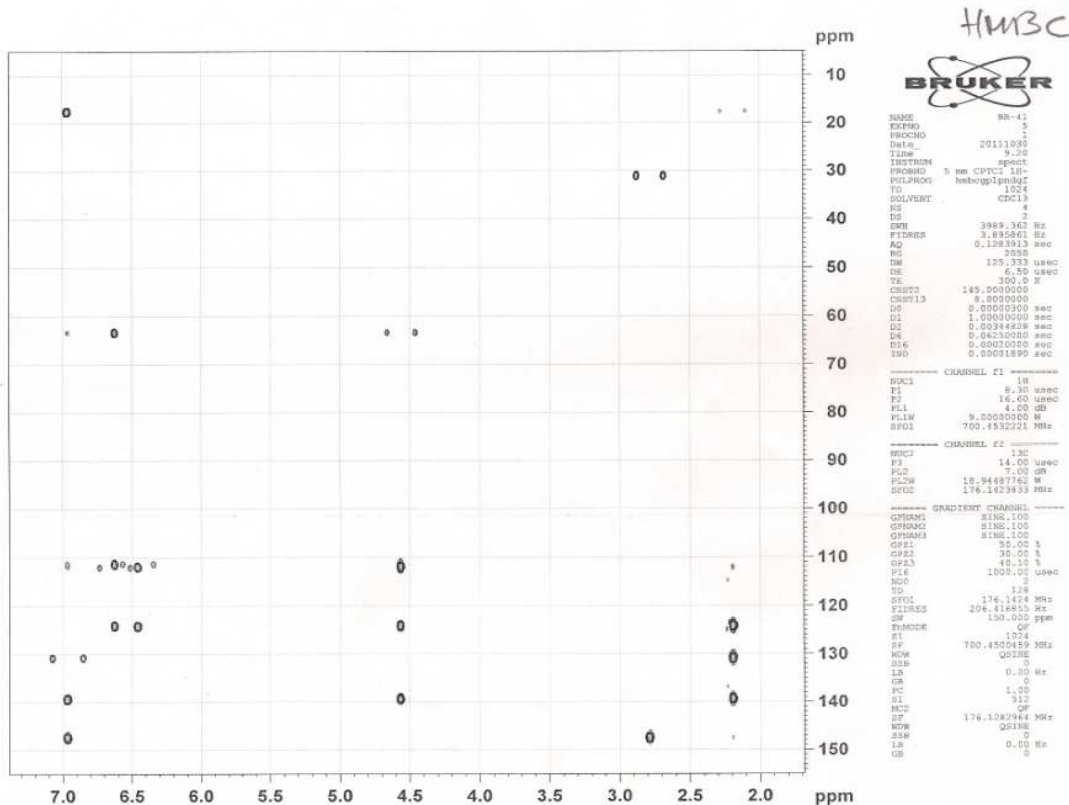

### NOESY of Compound 16:

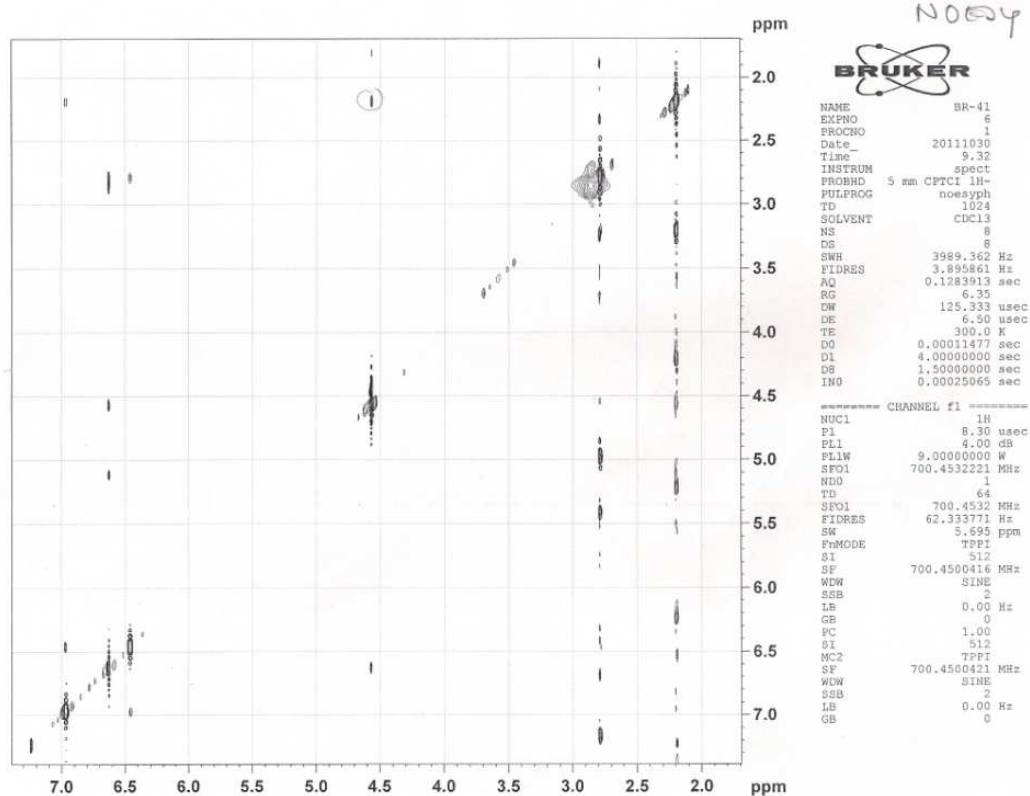

### NOESY of Compound 16:

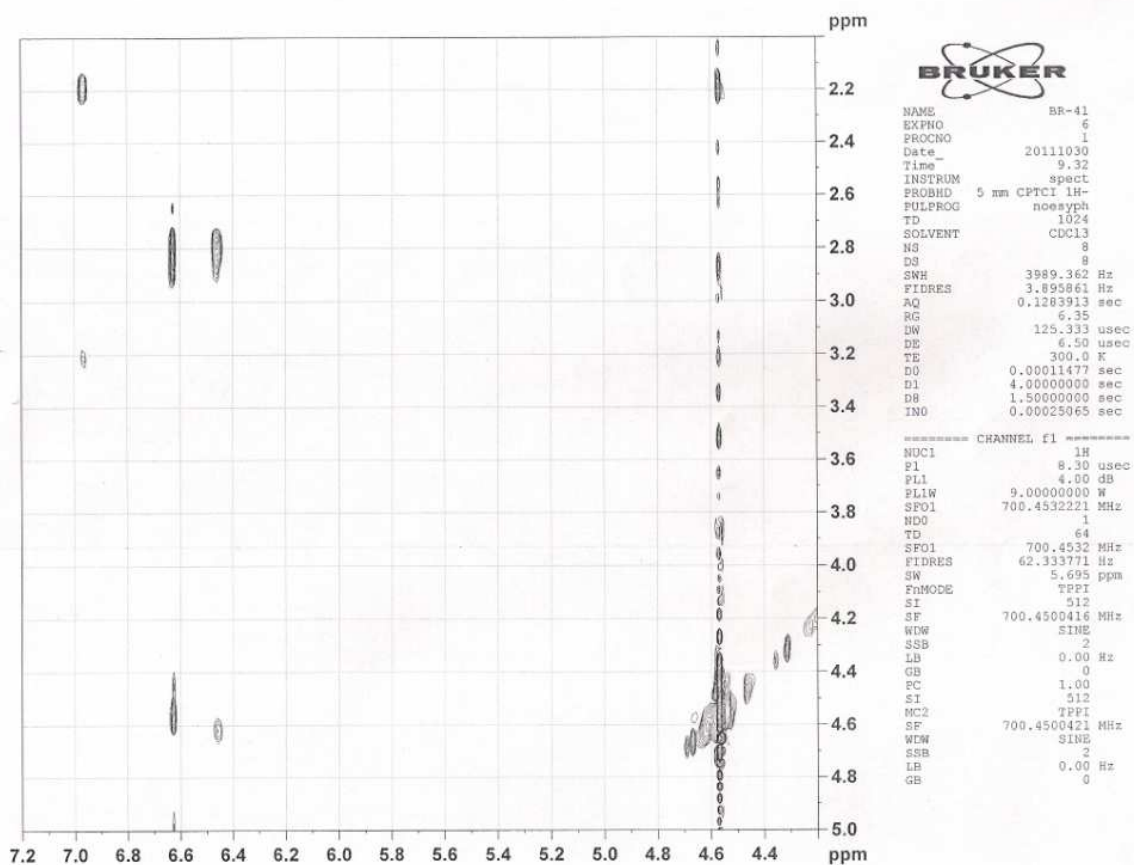

**$^1\text{H}$  NMR of Compound 17:**

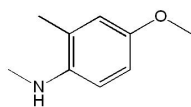

4-methoxy-*N*,2-dimethylaniline

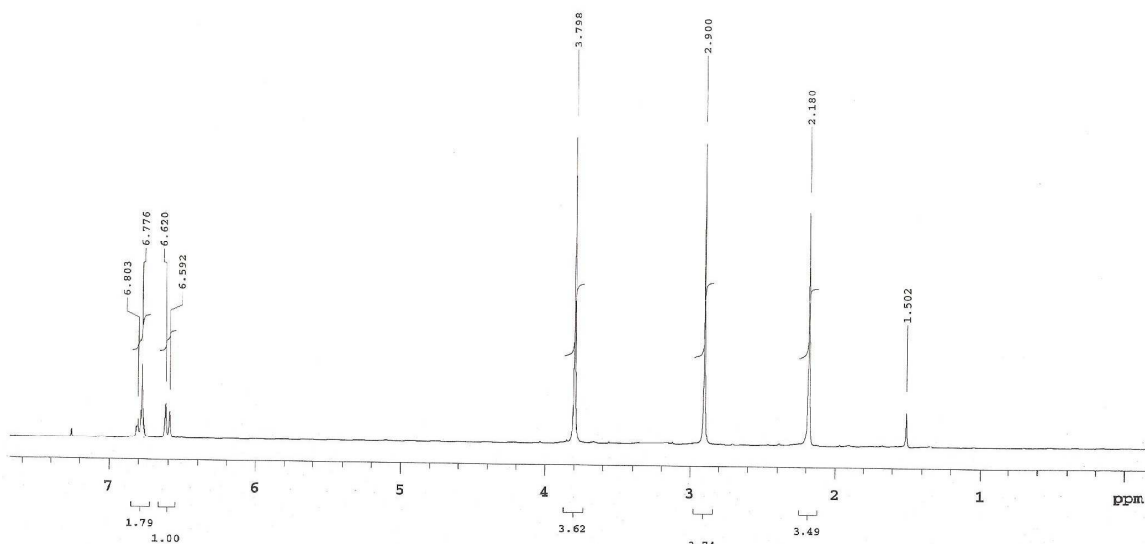

**$^{13}\text{C}$  NMR of Compound 17:**

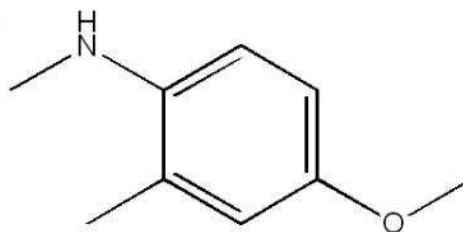

4-methoxy-*N*,2-dimethylaniline

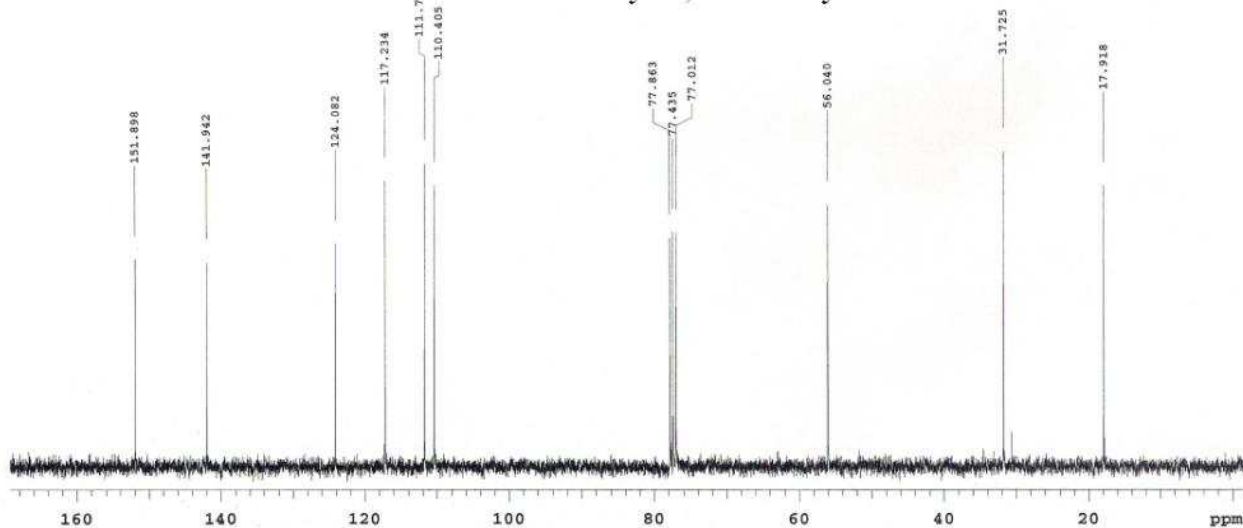

### HRMS of Compound 17:

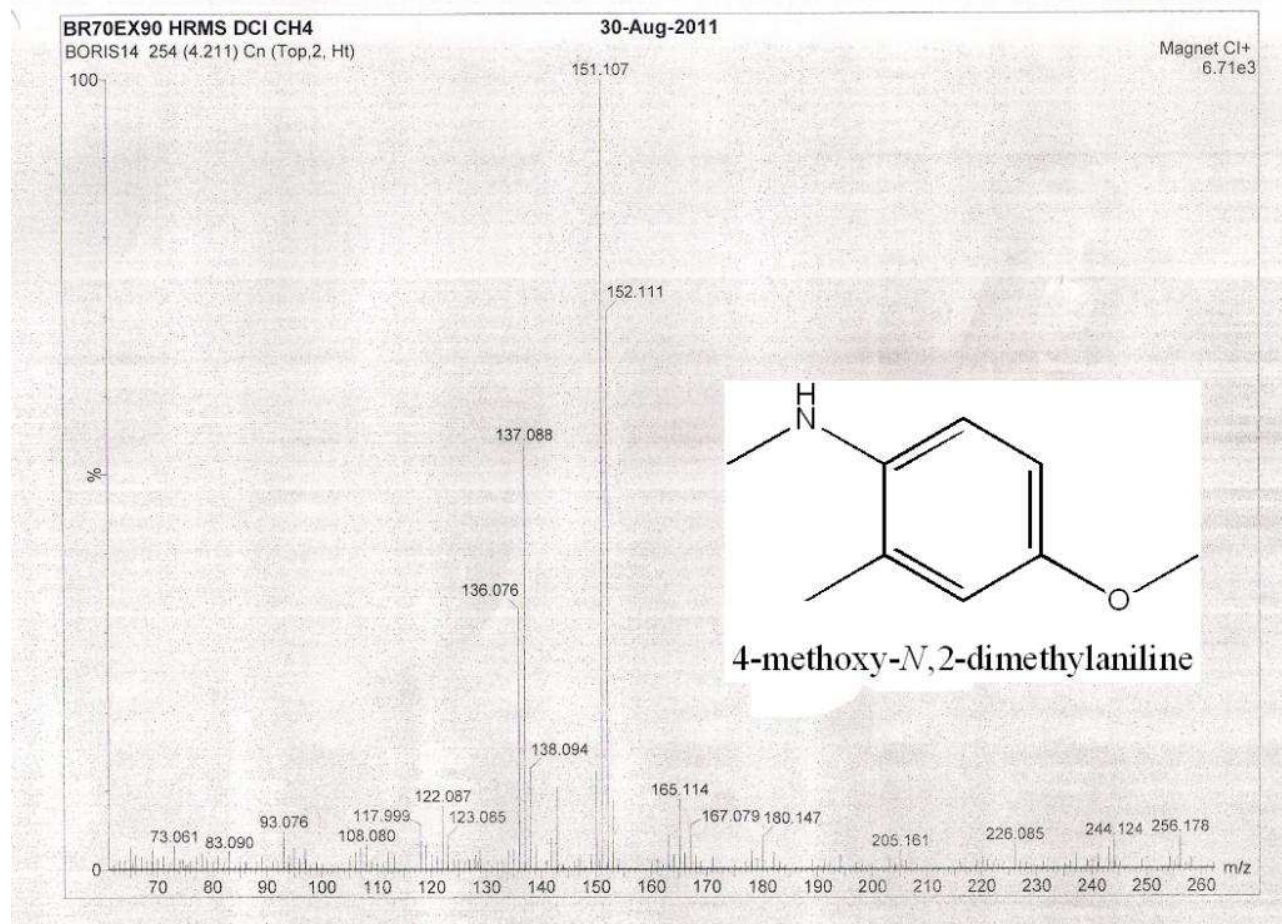

### <sup>1</sup>H NMR of Compound 18:

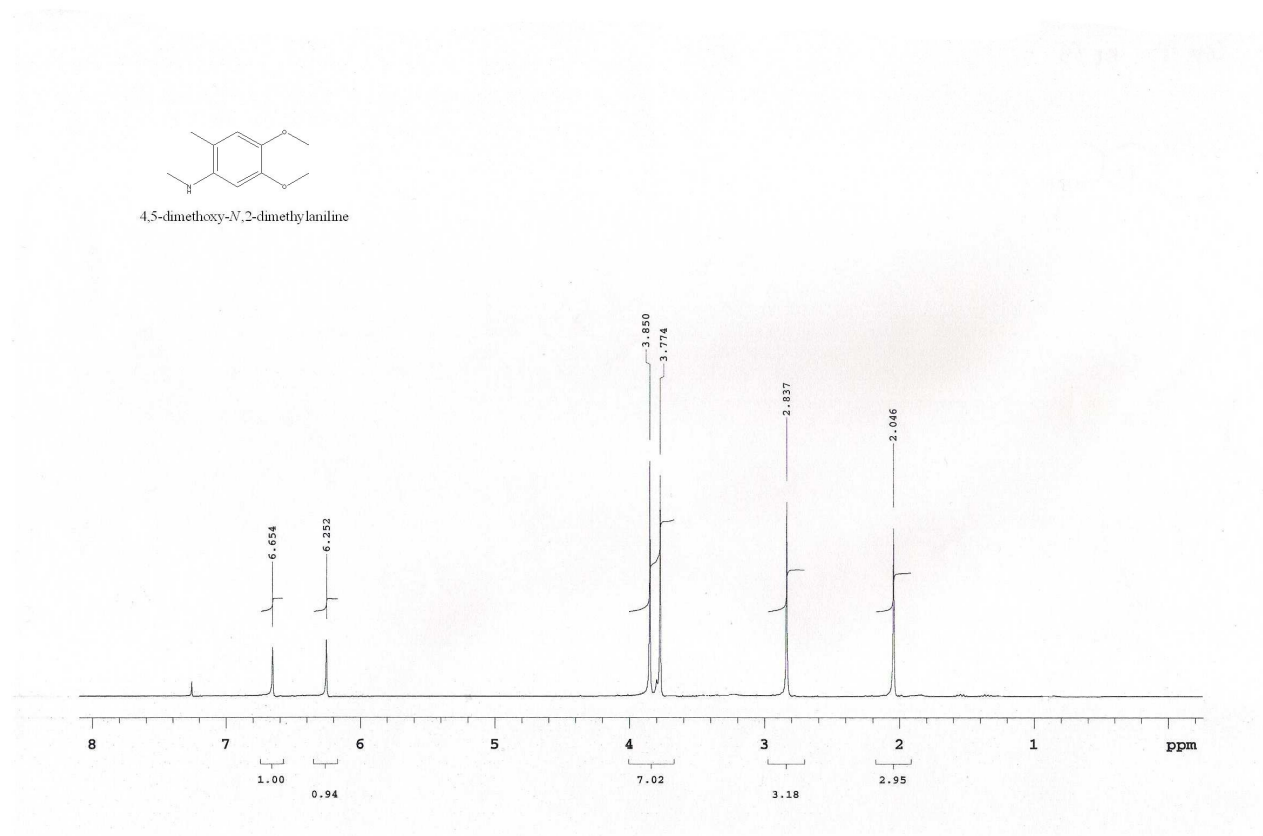



### <sup>13</sup>C NMR of Compound 18:

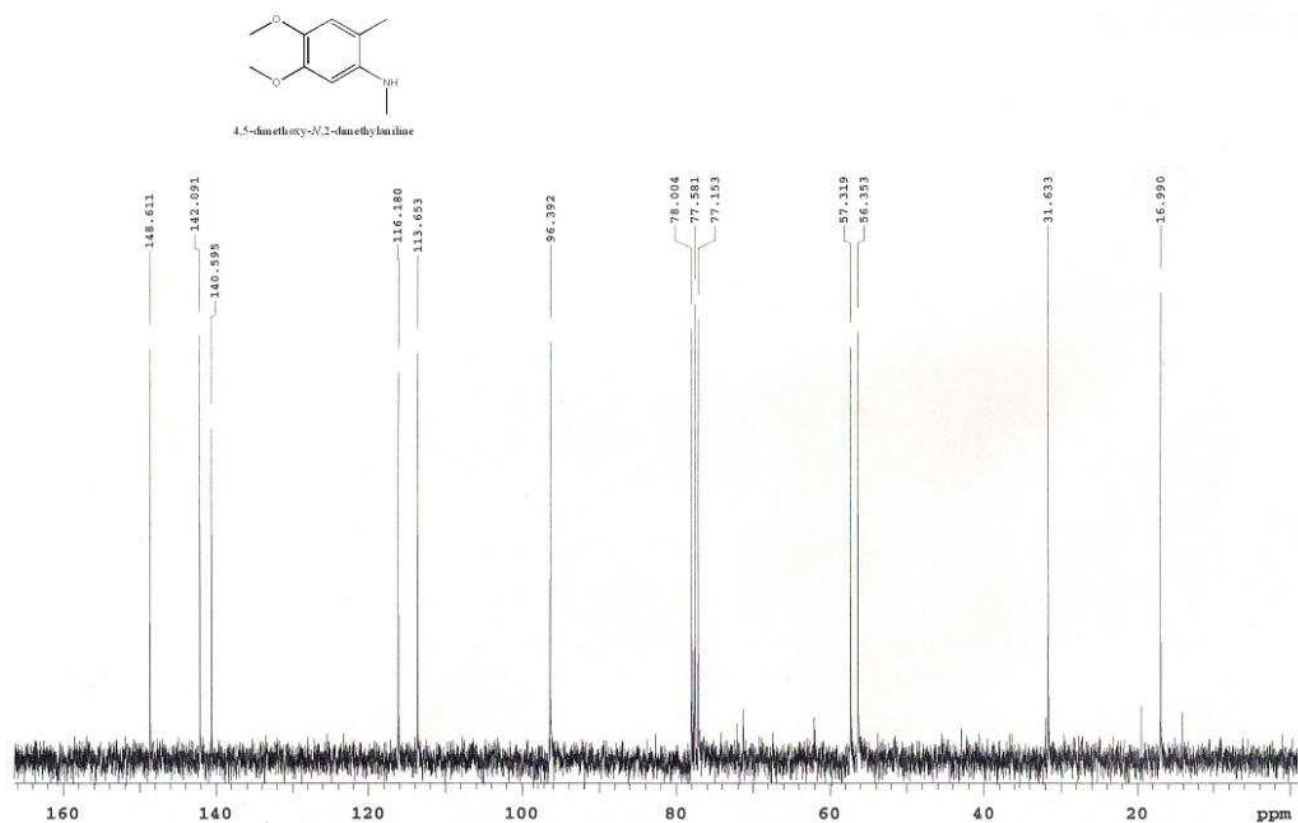

### HRMS of Compound 18:

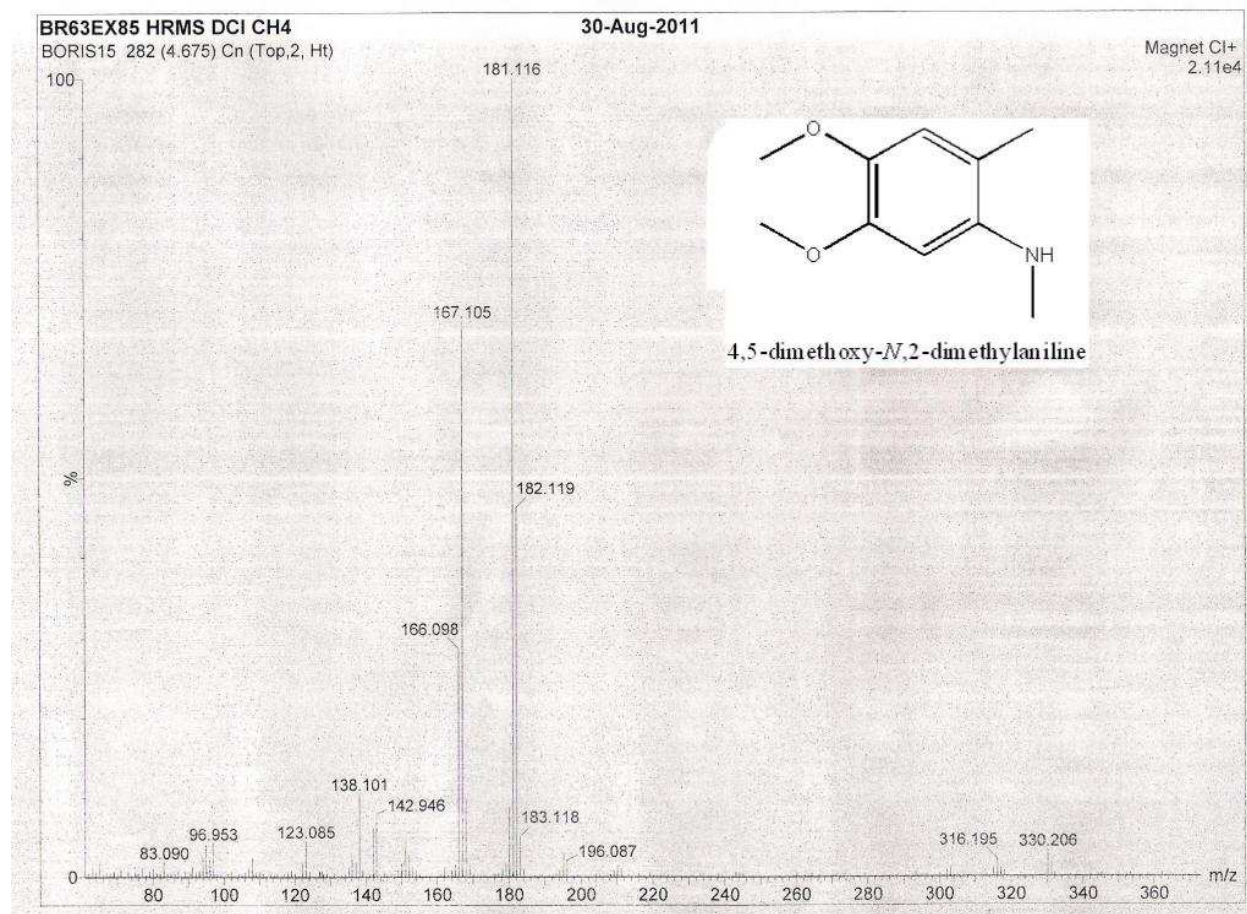

### $^1\text{H}$ NMR of Compound 19:

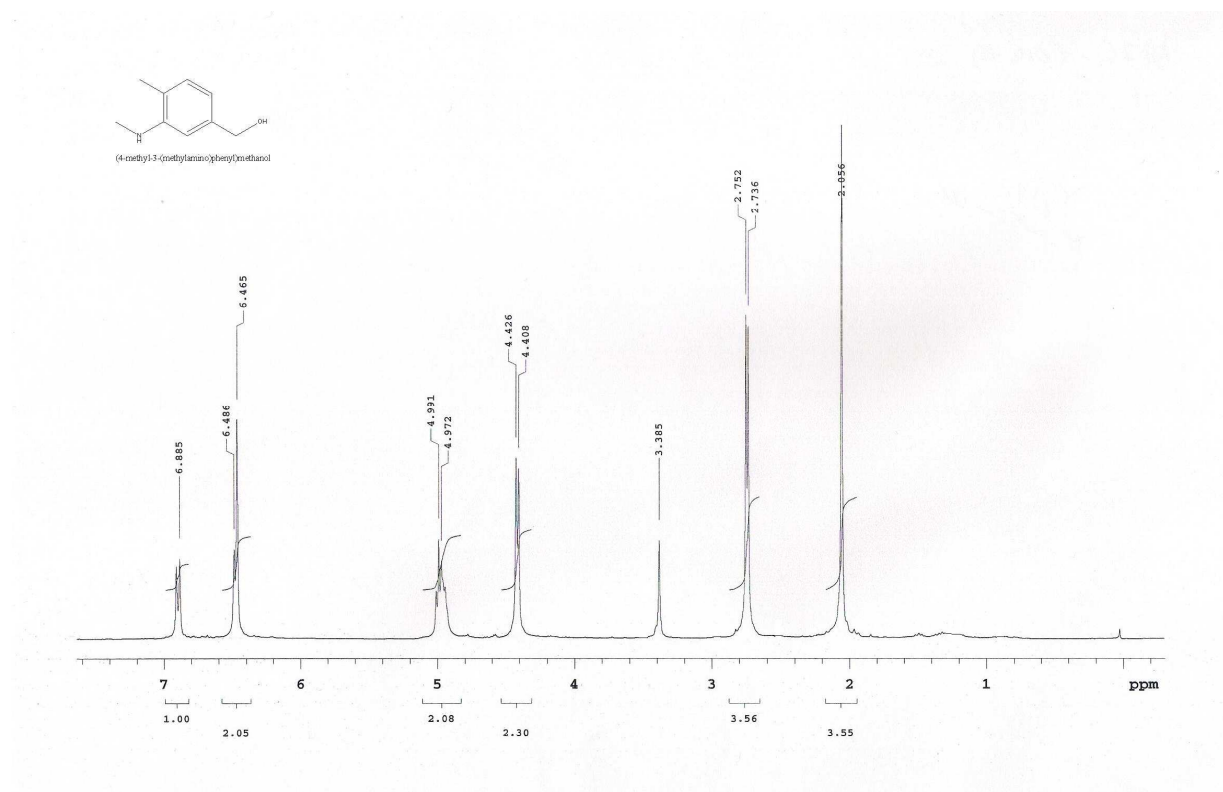

### $^{13}\text{C}$ NMR of Compound 19:

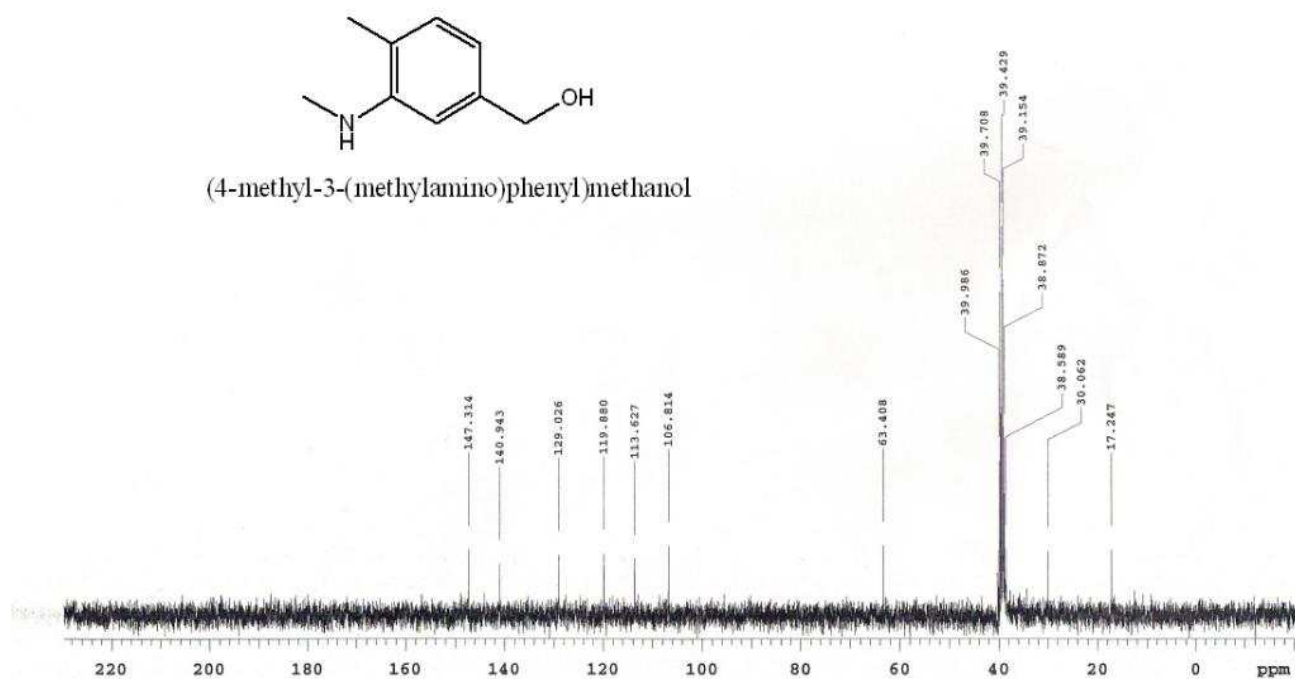

### HRMS of Compound 19:

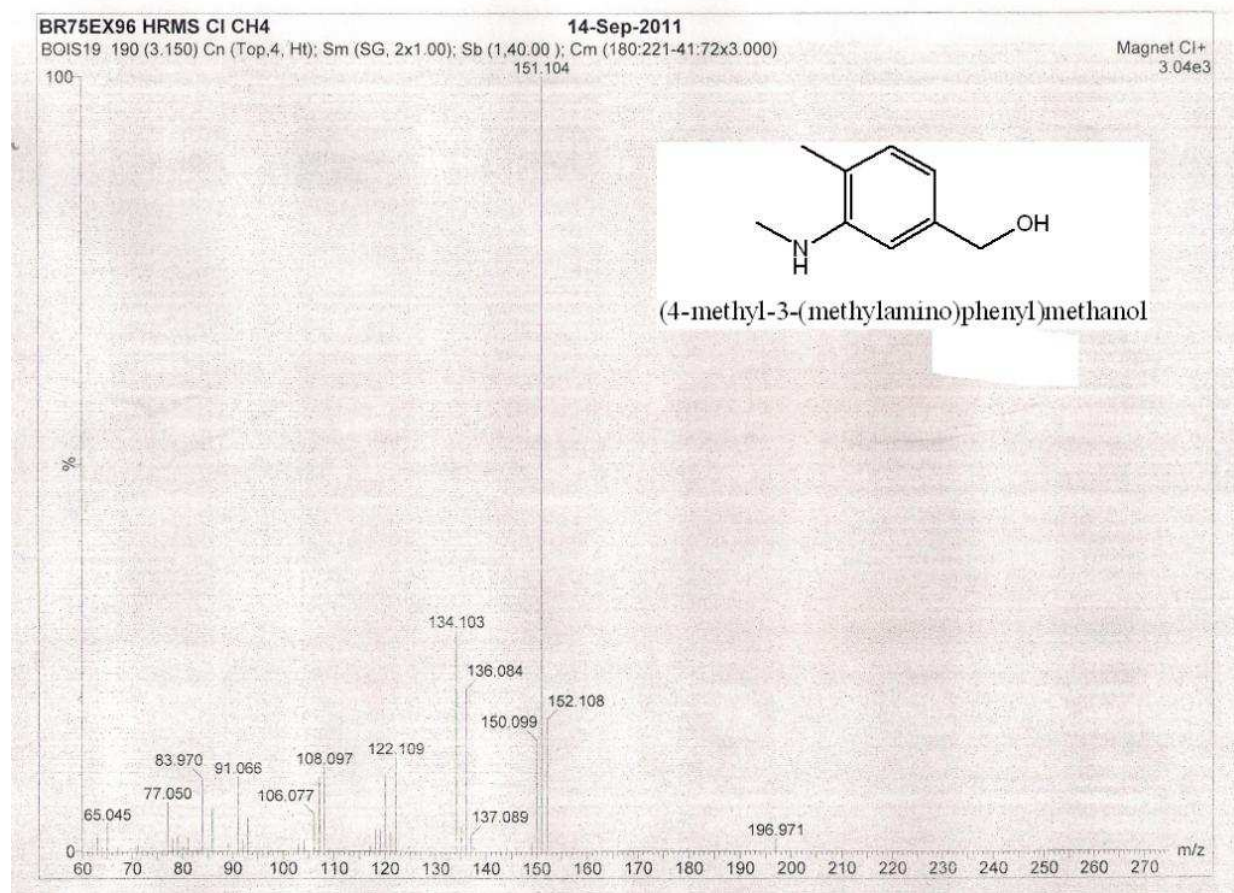

### <sup>1</sup>H NMR of Compound 20:

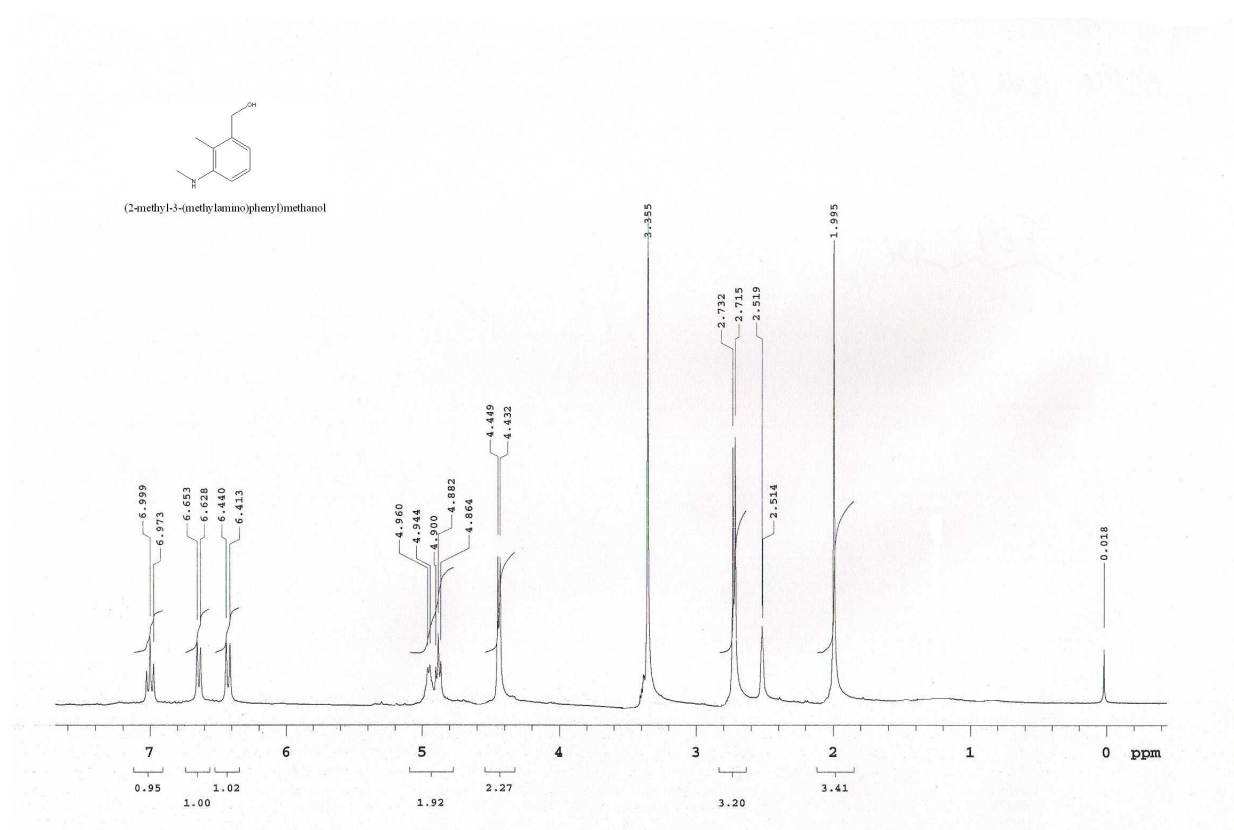



### <sup>13</sup>C NMR of Compound 20:

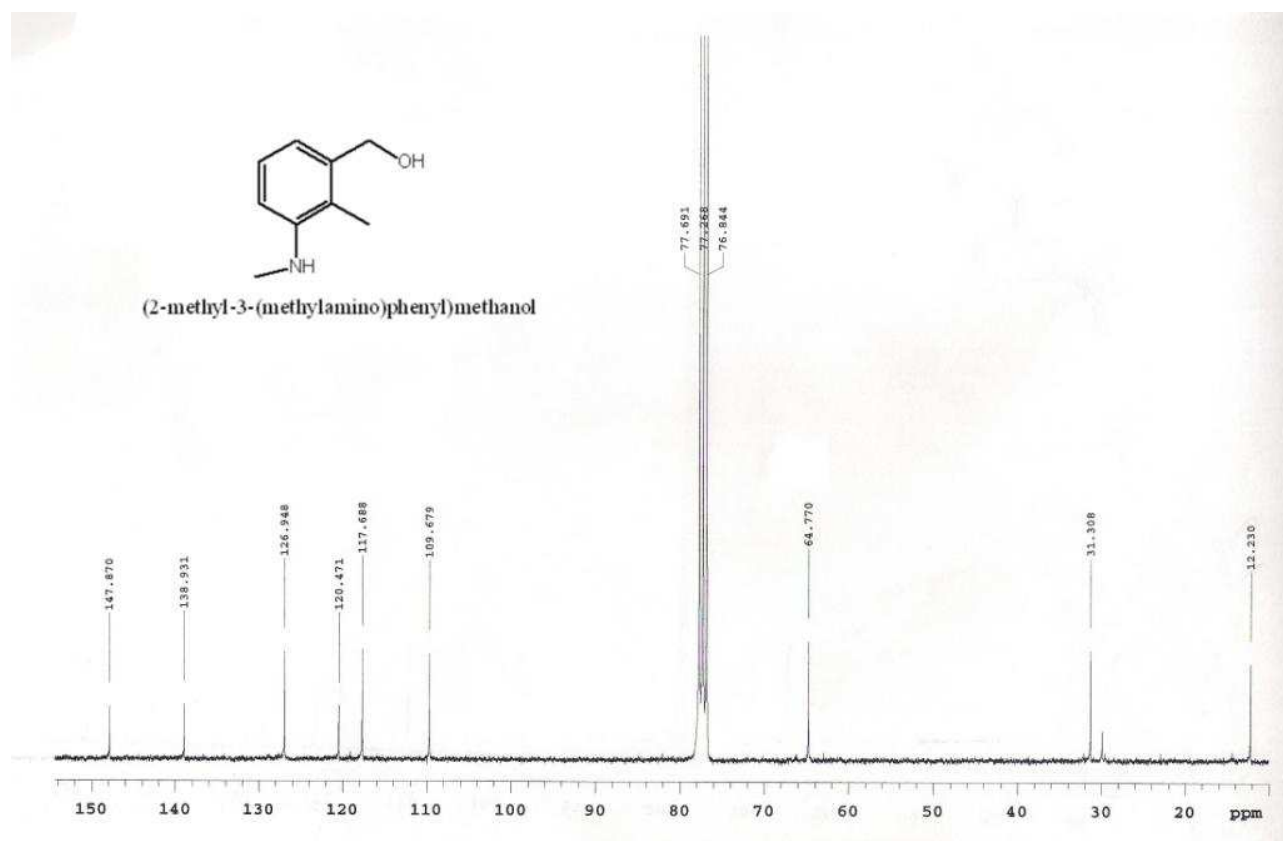

### MS of Compound 20:

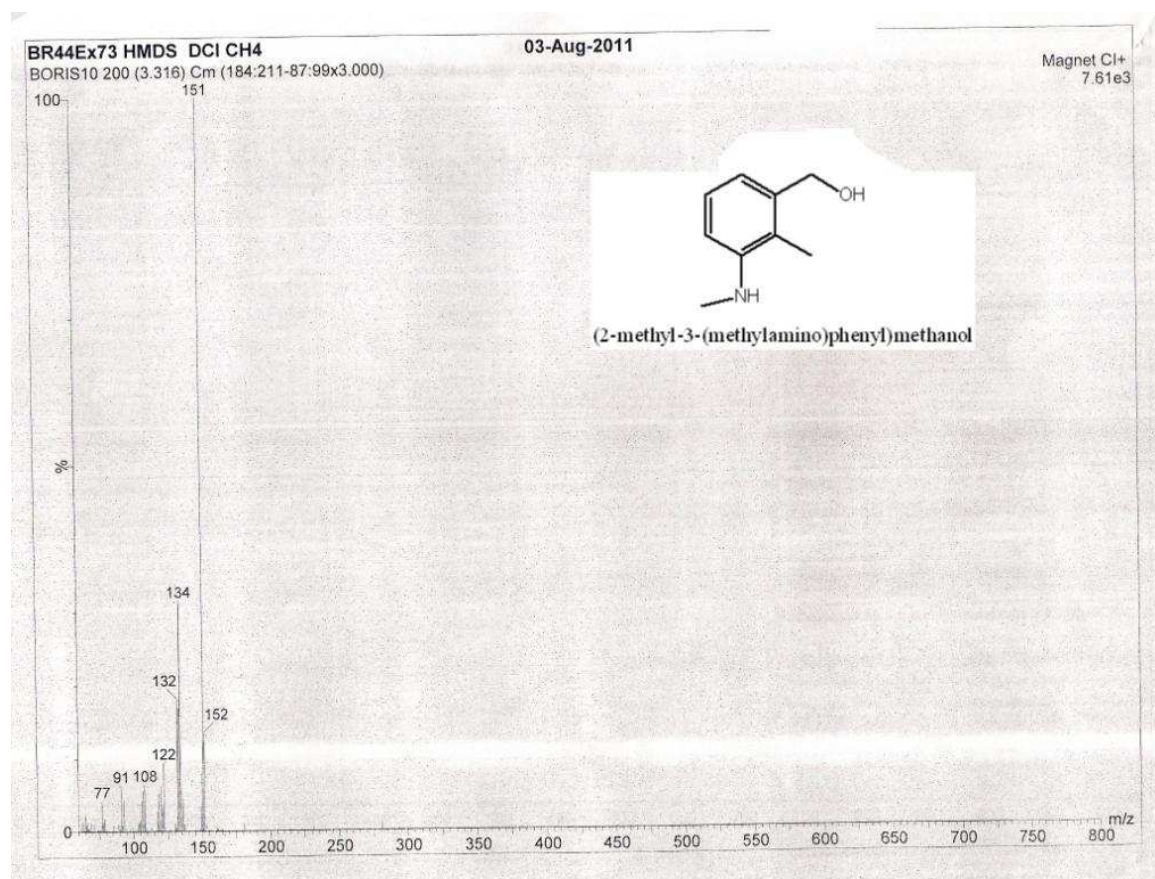



**<sup>1</sup>H NMR of Compound 21:**

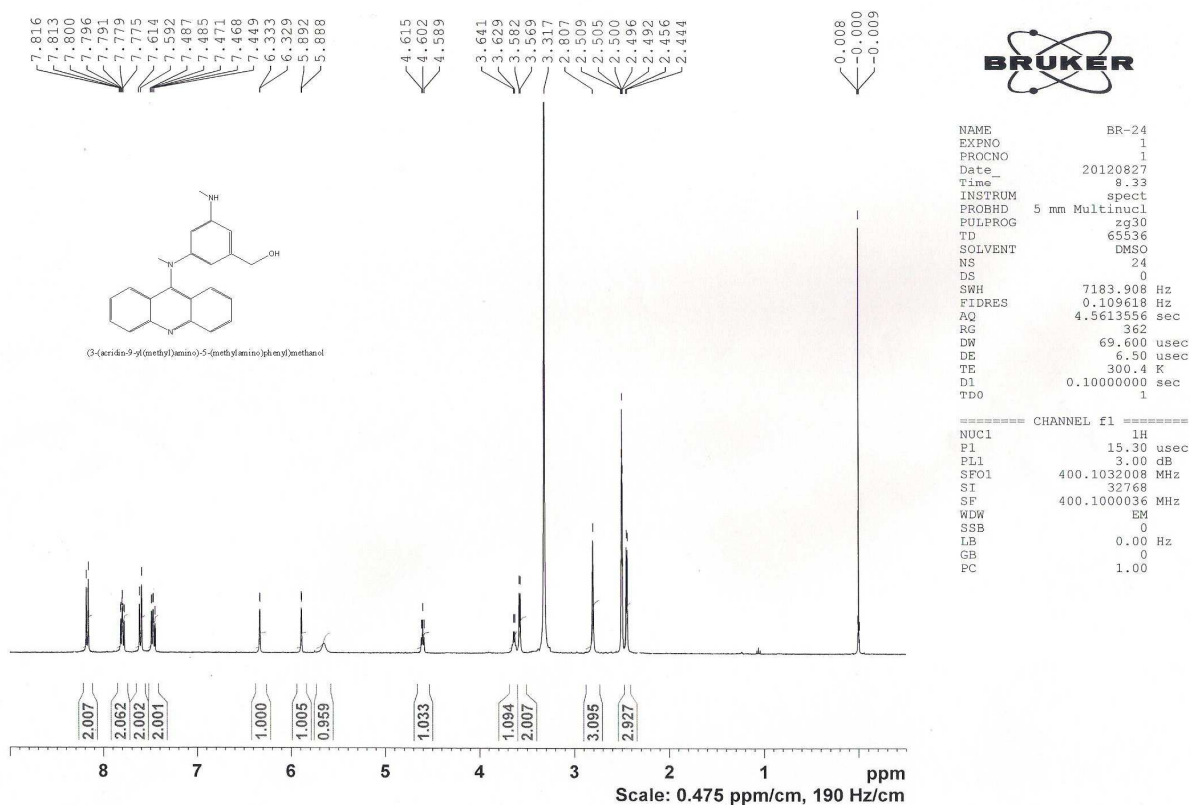

**<sup>13</sup>C NMR of Compound 21:**

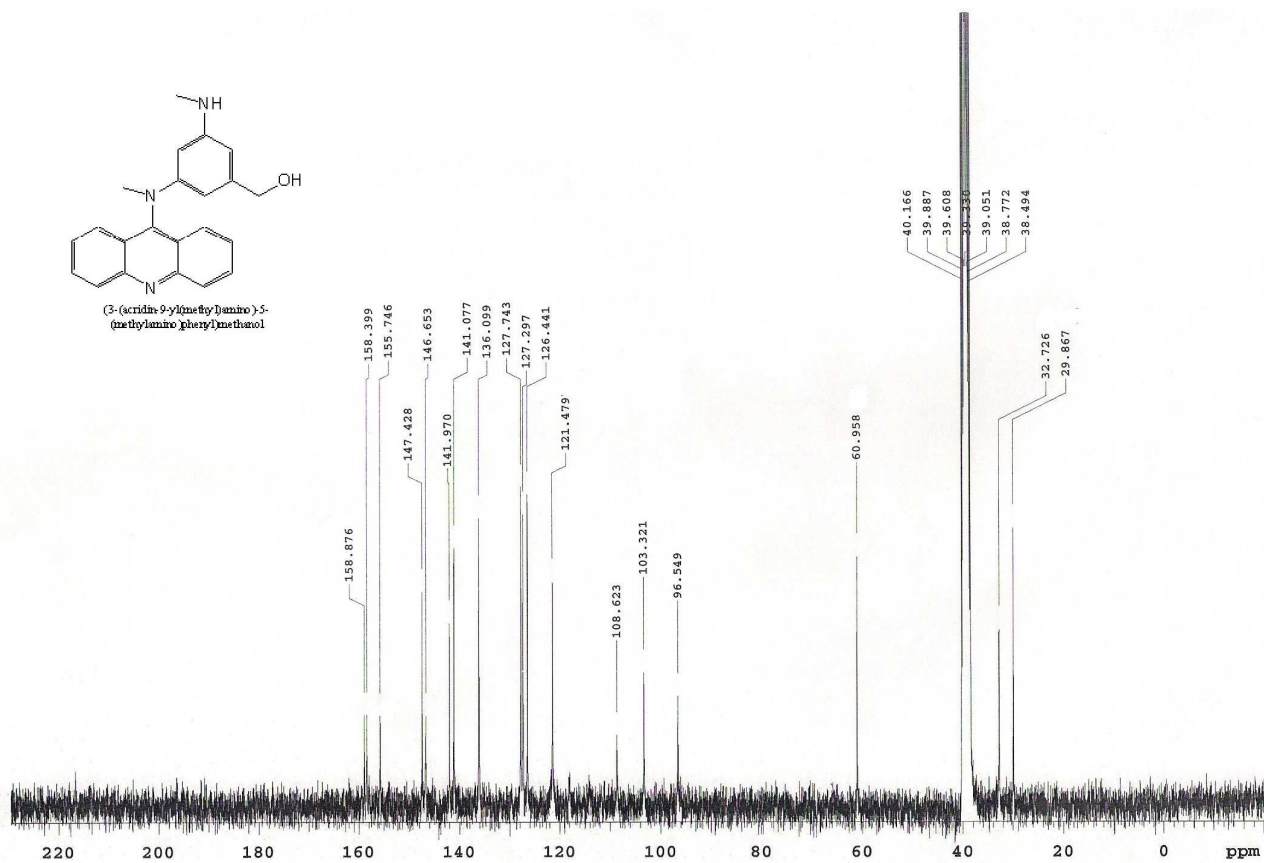

### HRMS of Compound 21:

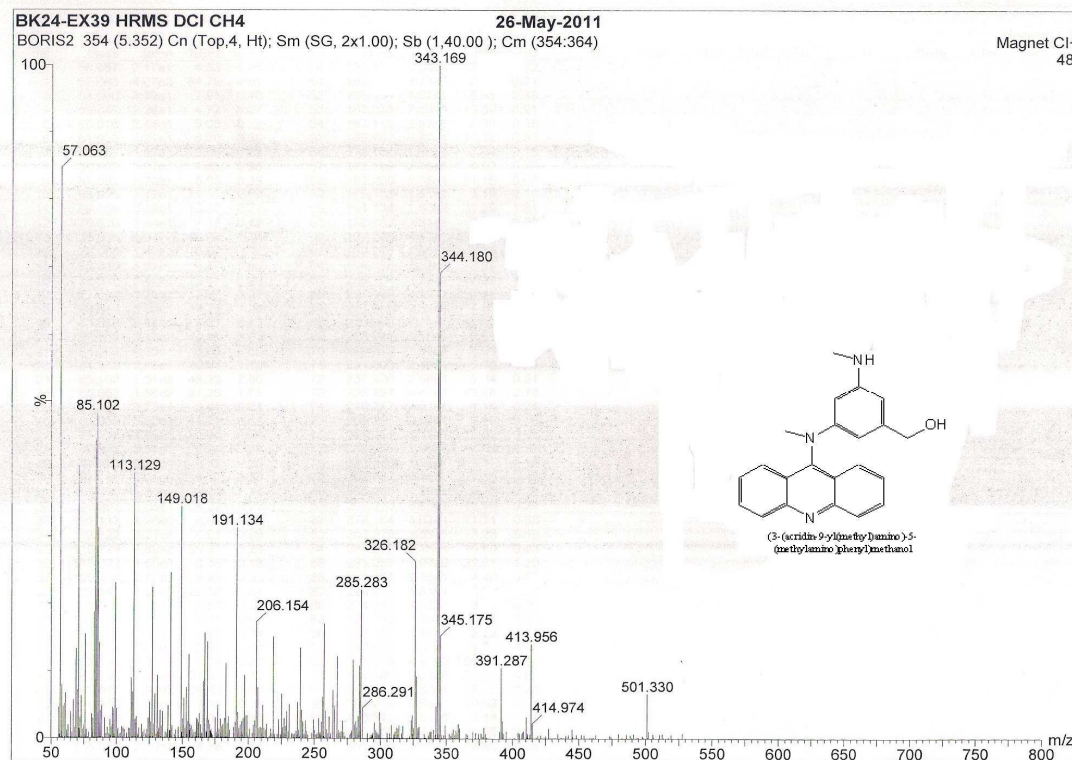

### <sup>1</sup>H NMR of Compound 22:

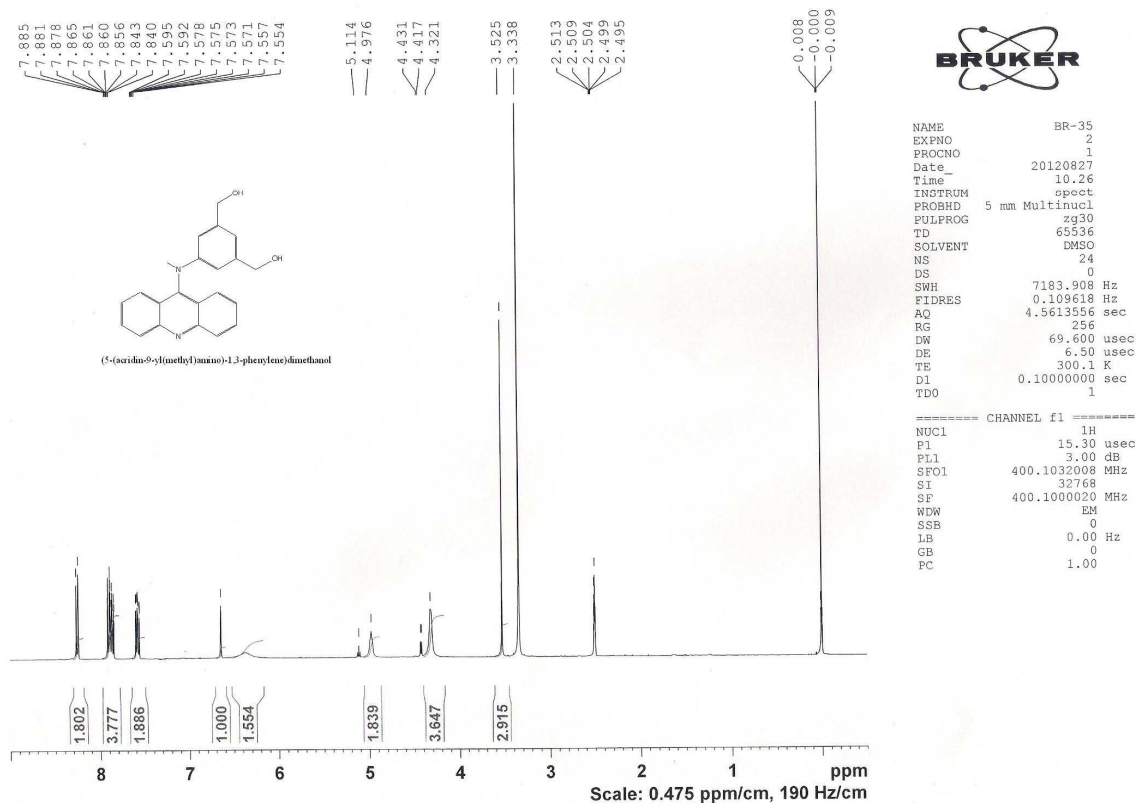

### <sup>13</sup>C NMR of Compound 22:

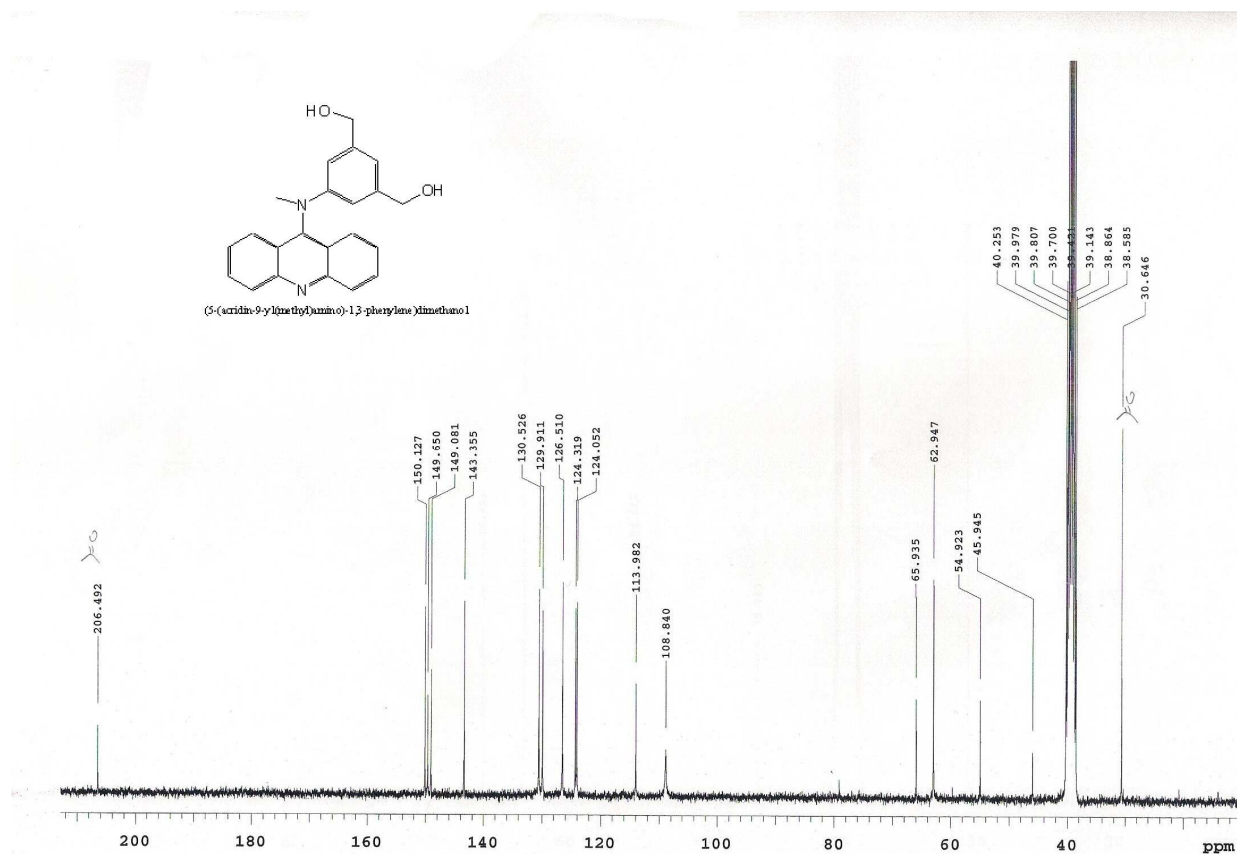

### HRMS of Compound 22:

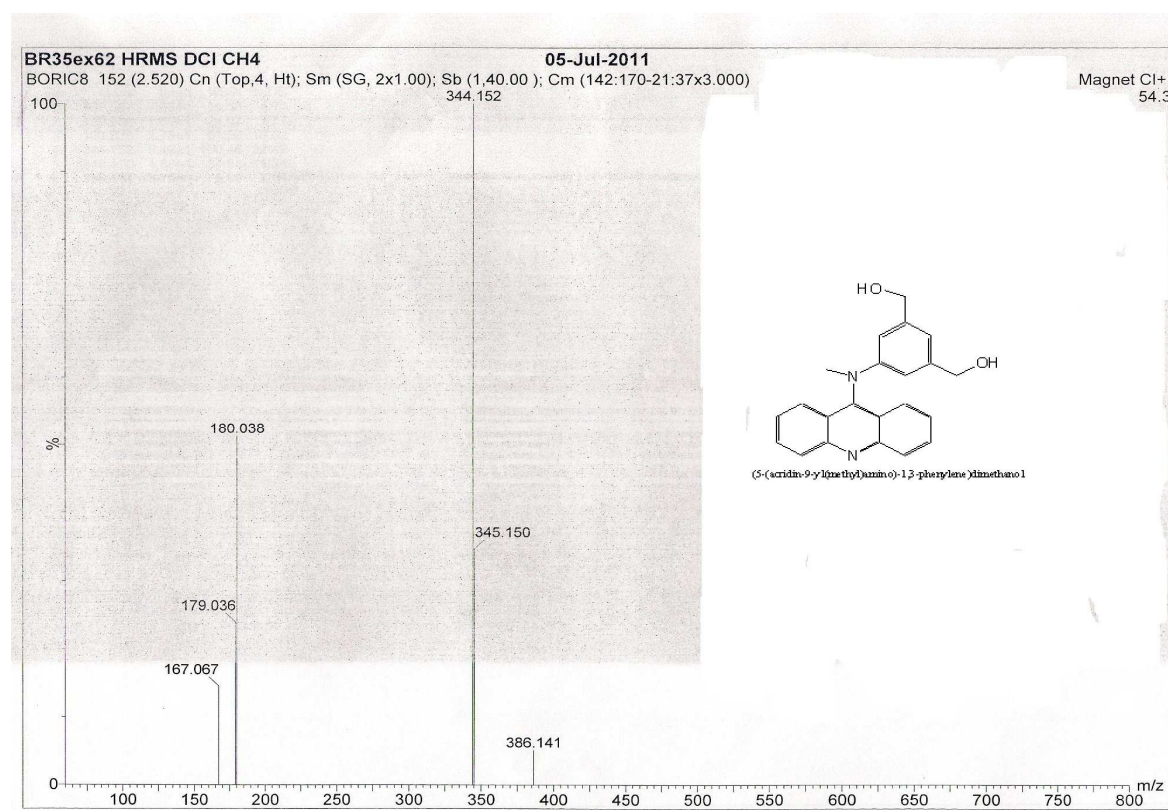



### <sup>1</sup>H NMR of Compound 23:

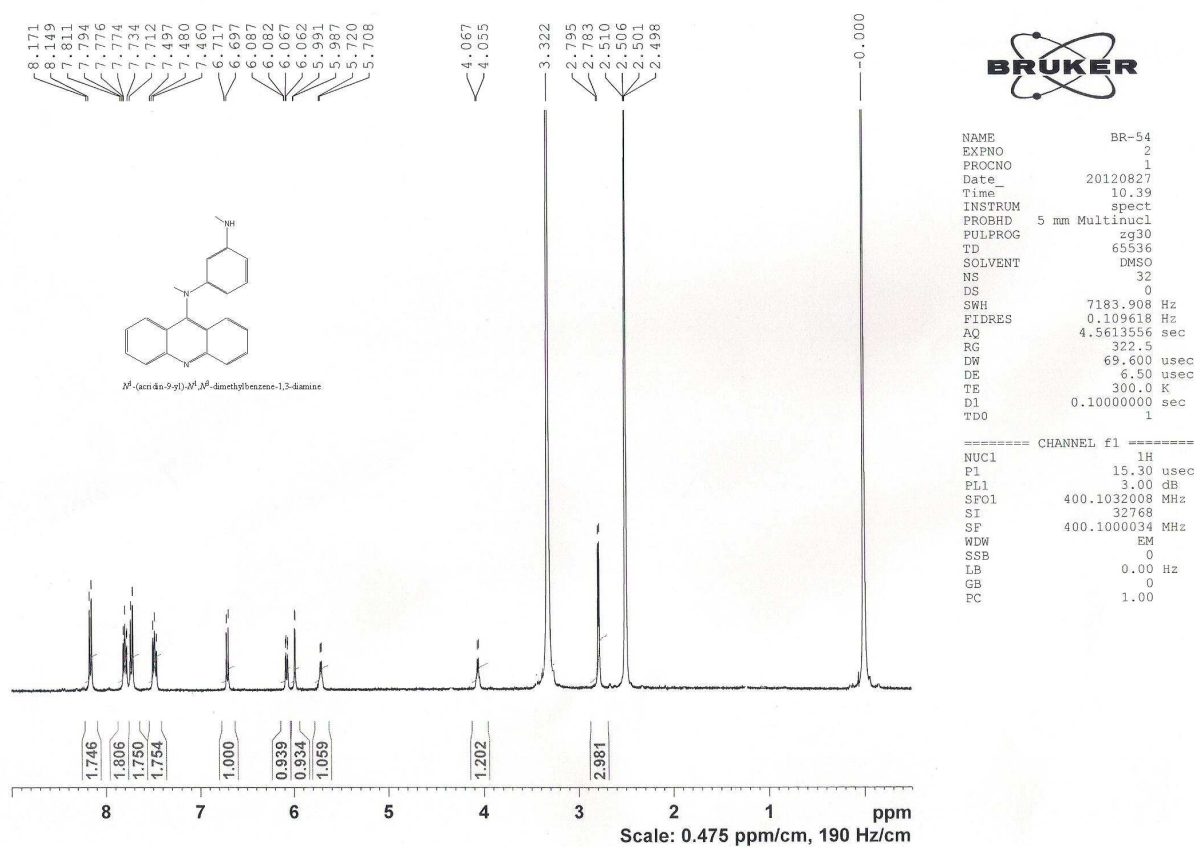

### <sup>13</sup>C NMR of Compound 23:

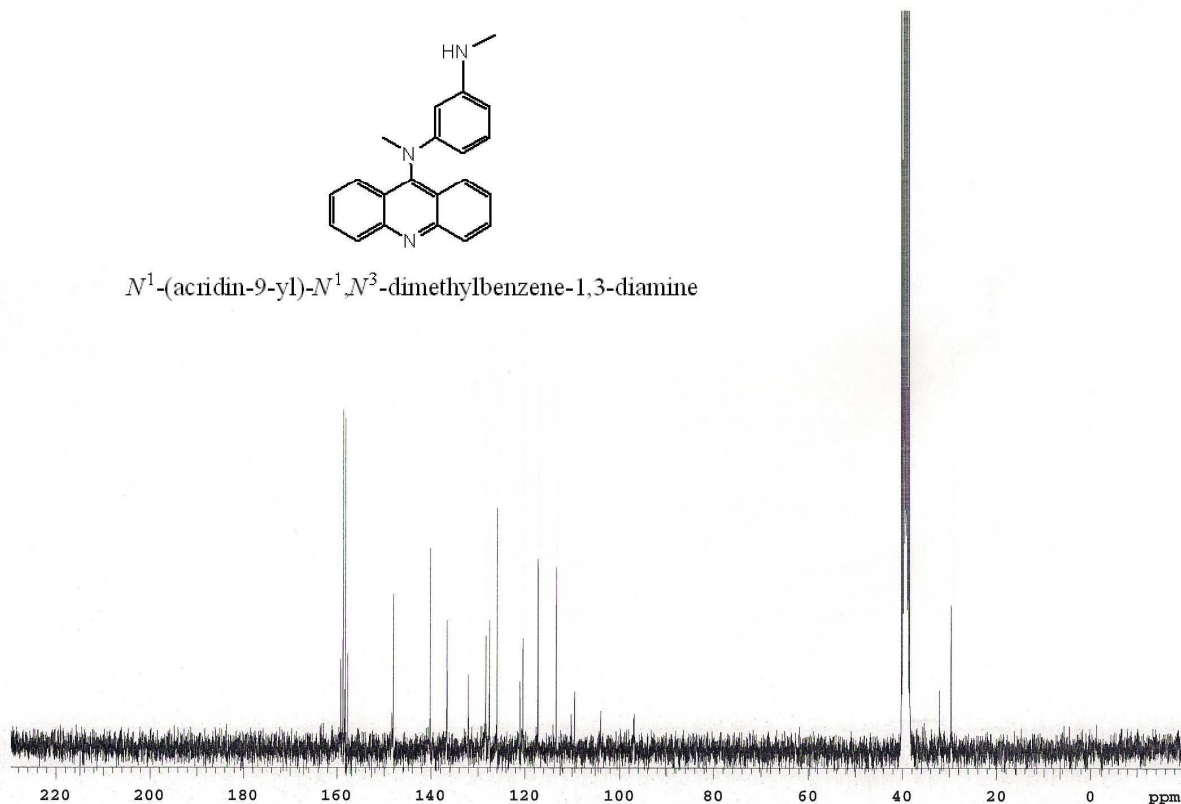



**HRMS of Compound 23:**

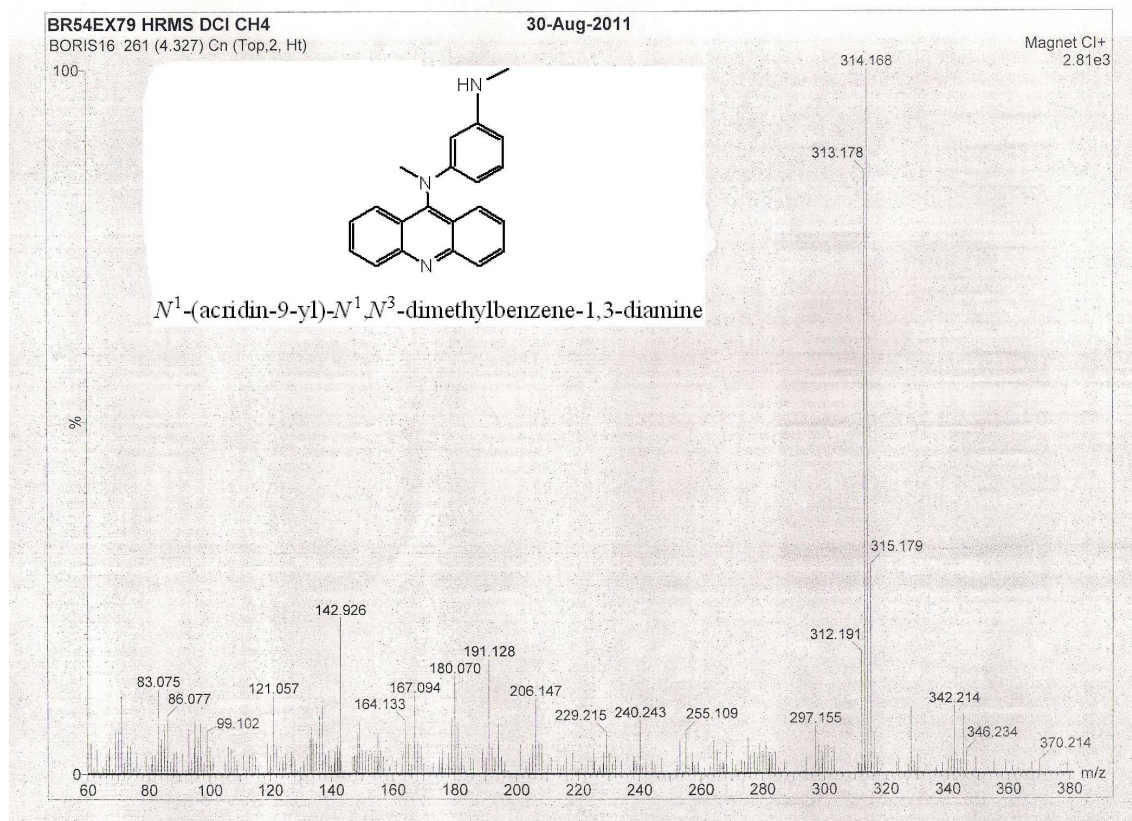

**<sup>1</sup>H NMR of Compound 24:**

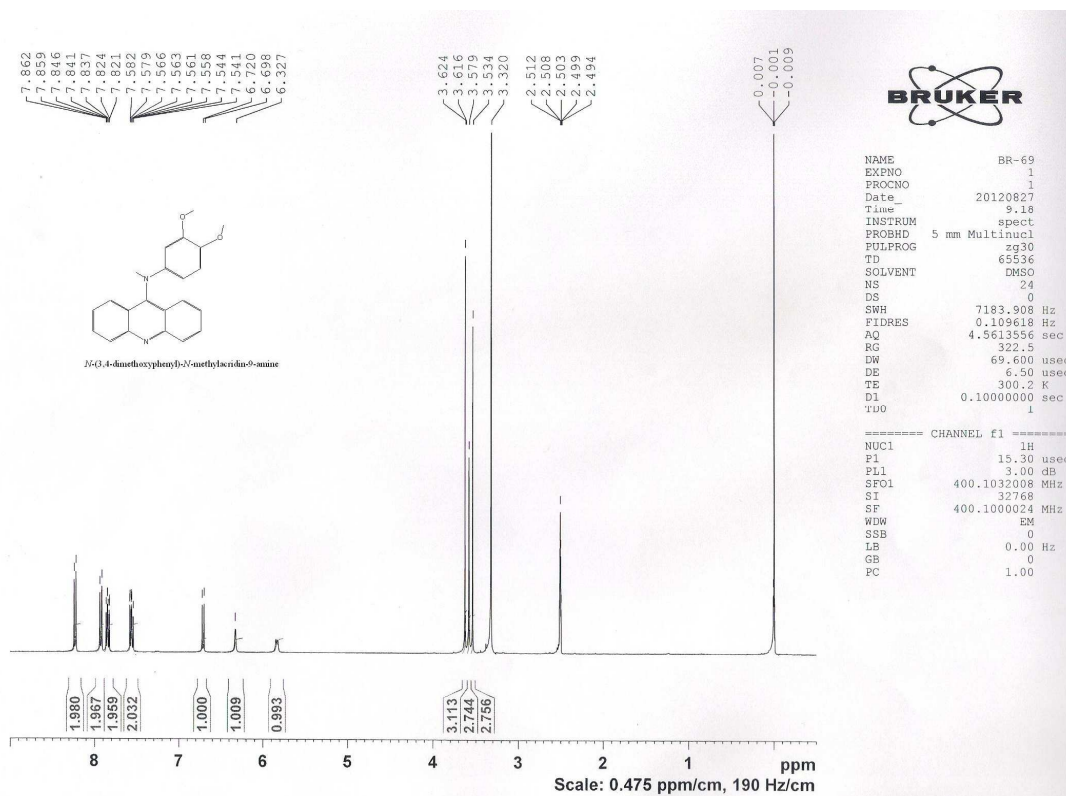

### <sup>13</sup>C NMR of Compound 24:

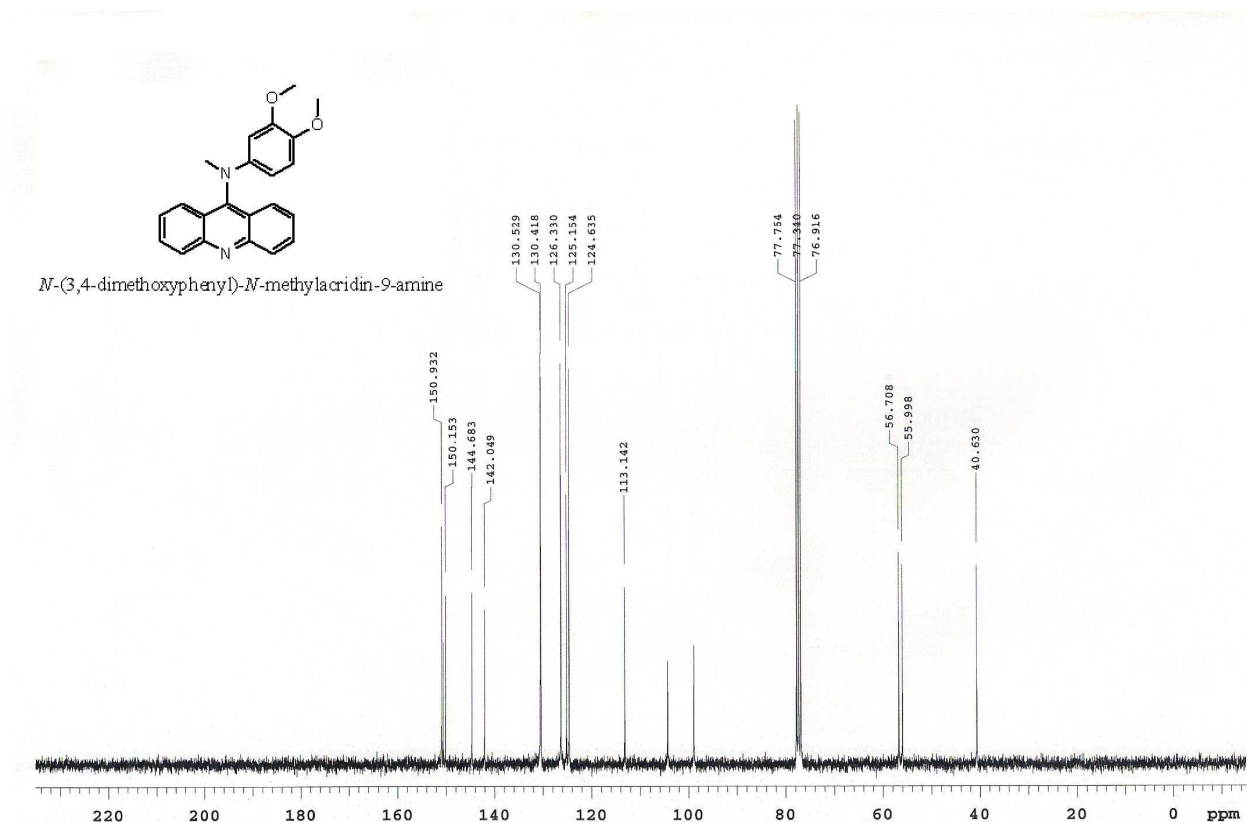

### HRMS of Compound 24:

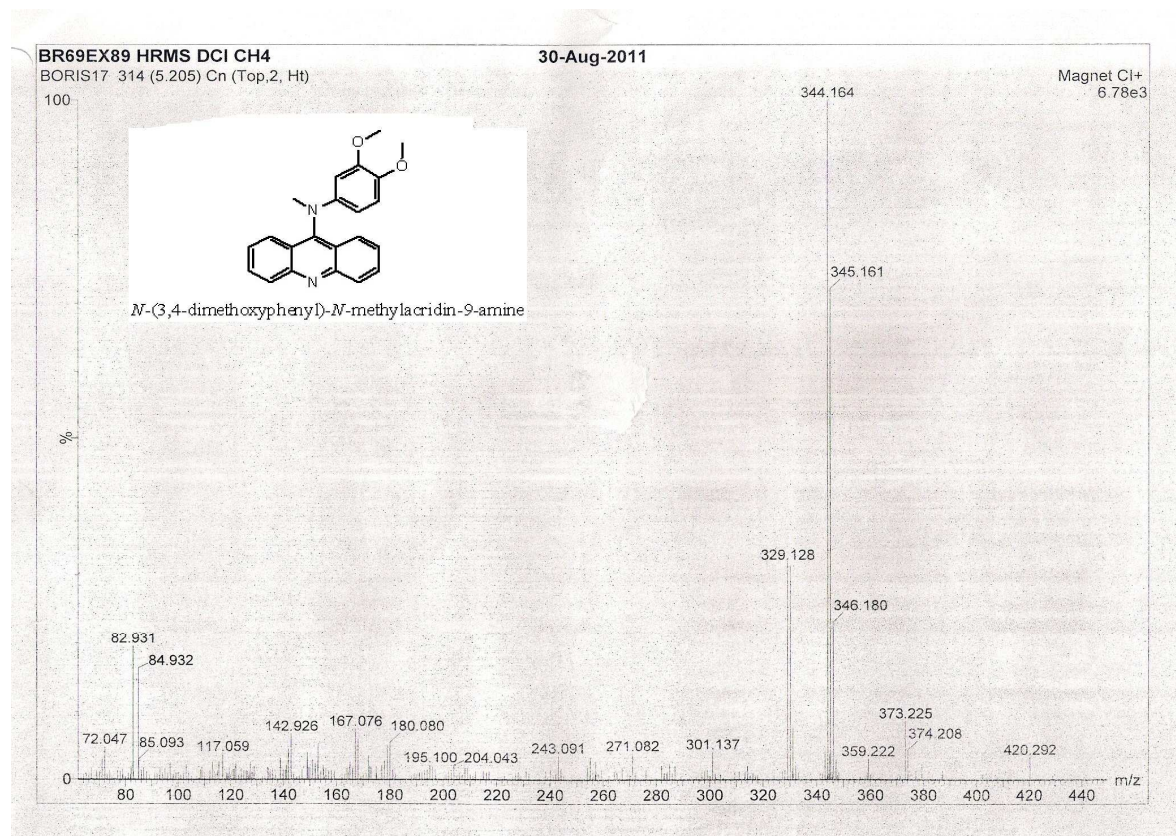



**<sup>1</sup>H NMR of Compound 25:**

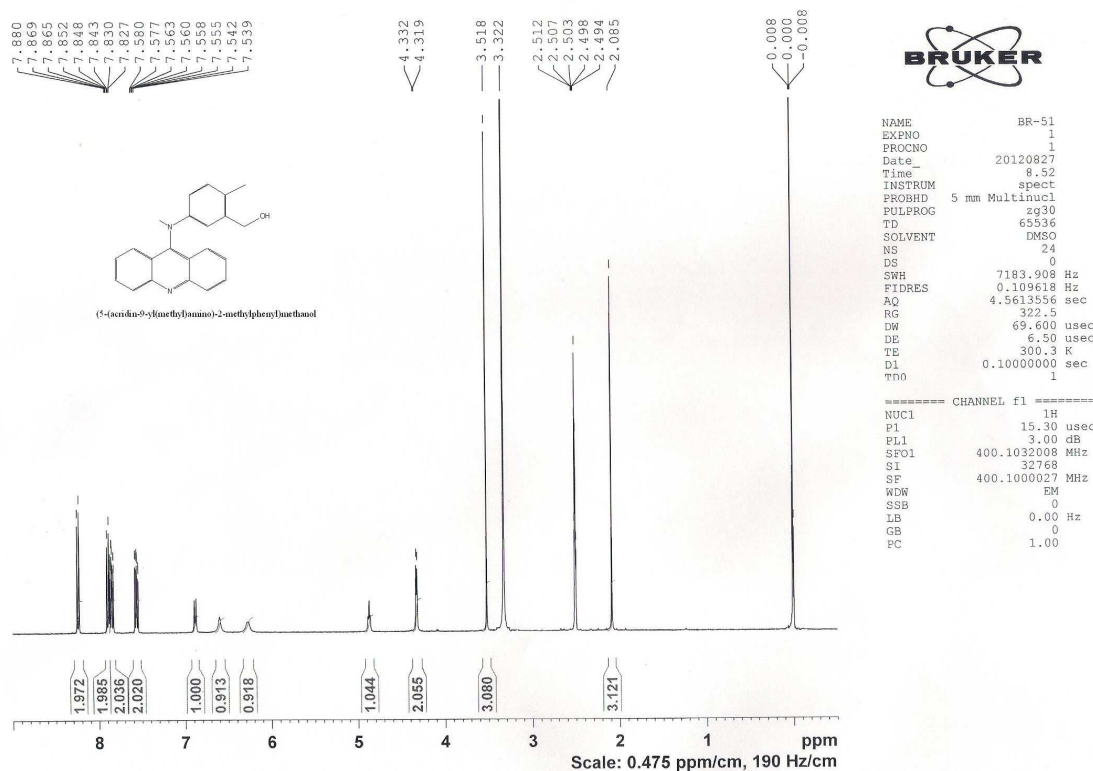

**<sup>13</sup>C NMR of Compound 25:**

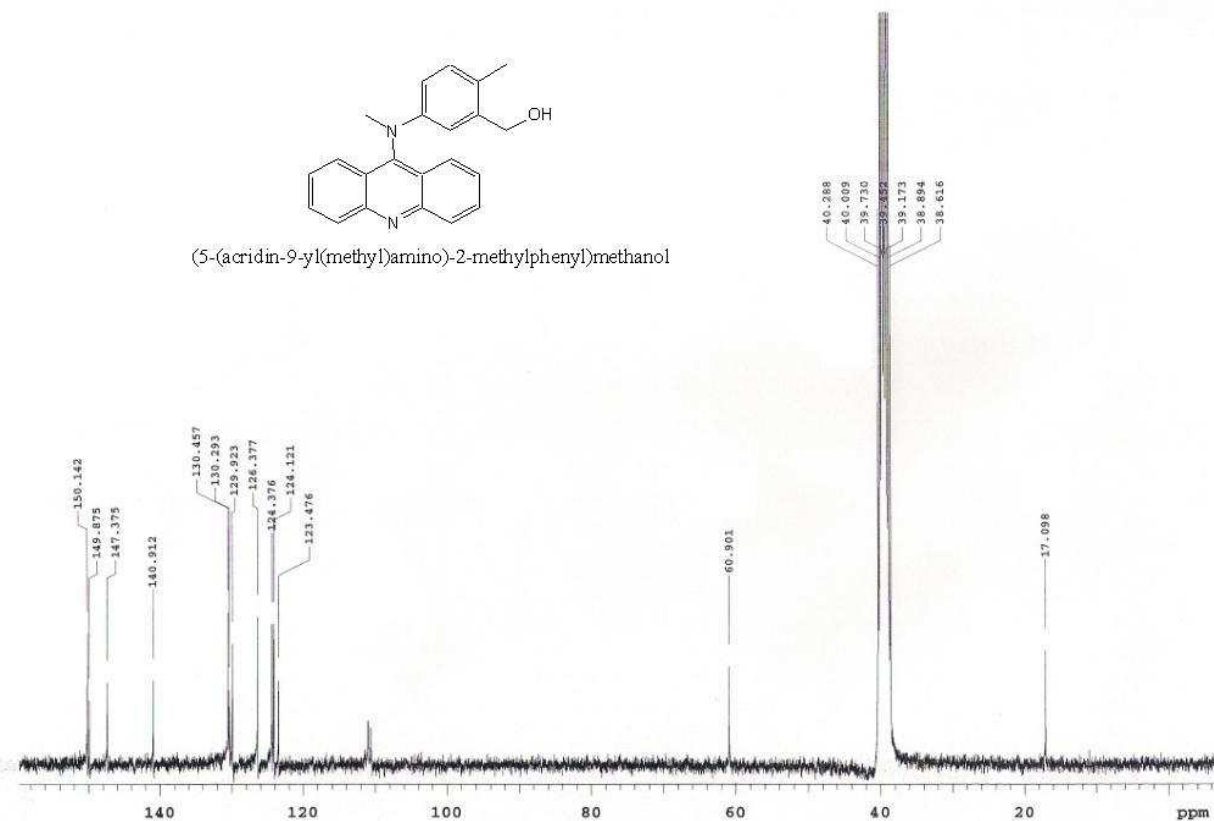



### HRMS of Compound 25:

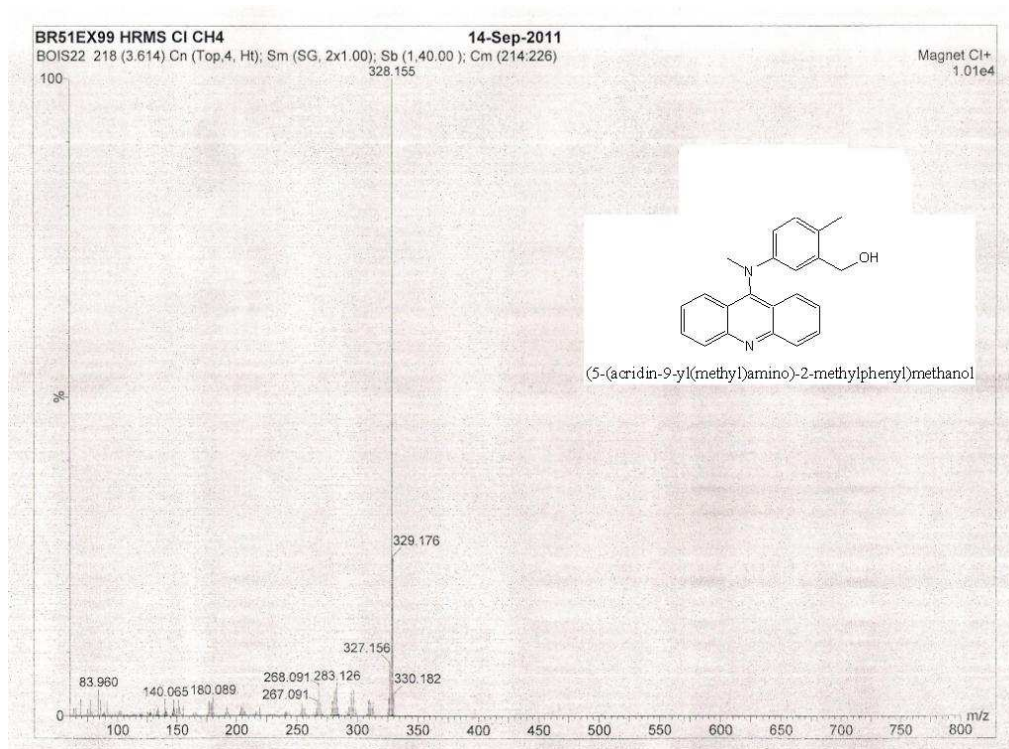

Supplement: c2nj40567a.pdf [file c2nj40567a.pdf]
